1 **Title**

- 2 • **Full title:** Developmental dynamics of the neural crest-mesenchymal axis in creating the  
3 thymic microenvironment.  
4 • **Short title:** Developmental mesenchymal dynamics in the thymus.

5  
6 **Authors**

7 Adam E. Handel<sup>1,2†</sup>, Stanley Cheuk<sup>1,3†</sup>, Fatima Dhalla<sup>1</sup>, Stefano Maio<sup>1</sup>, Tania Hübscher<sup>4</sup>,  
8 Ioanna Rota<sup>1</sup>, Mary E. Deadman<sup>1</sup>, Olov Ekwall<sup>3,5</sup>, Matthias Lütolf<sup>4</sup>, Kenneth Weinberg<sup>6</sup>,  
9 Georg Holländer<sup>1,7,8\*</sup>

10  
11 **Affiliations**

- 12 1. Department of Paediatrics and the Weatherall Institute of Molecular Medicine,  
13 University of Oxford, Oxford, United Kingdom.  
14 2. Nuffield Department of Clinical Neurosciences, University of Oxford, Oxford, United  
15 Kingdom.  
16 3. Department of Rheumatology and Inflammation Research, University of Gothenburg,  
17 Gothenburg, Sweden.  
18 4. Laboratory of Stem Cell Bioengineering, Swiss Federal Institute of Technology in  
19 Lausanne, Lausanne, Switzerland.  
20 5. Department of Pediatrics, University of Gothenburg, Gothenburg, Sweden.  
21 6. Division of Stem Cell Transplantation and Regenerative Medicine Department of  
22 Pediatrics, Stanford University, Stanford, USA.  
23 7. Paediatric Immunology, Department of Biomedicine, University of Basel and  
24 University Children's Hospital Basel, Basel, Switzerland.  
25 8. Department of Biosystems Science and Engineering, ETH Zurich, Basel, Switzerland.

26  
27 \* Corresponding author: [georg.hollander@paediatrics.ox.ac.uk](mailto:georg.hollander@paediatrics.ox.ac.uk)

28 † These authors contributed equally.  
29  
30

31 **Abstract**

32

33 The thymic stroma is composed of epithelial and non-epithelial cells that collectively provide  
34 separate microenvironments controlling the homing of blood-born precursors to the tissue, and  
35 their subsequent differentiation to functionally mature and correctly selected T cells. While  
36 thymic epithelial cells are well characterized for their role in thymopoiesis, a comparably  
37 comprehensive analysis of the non-epithelial thymic stroma is lacking. Here we explore at single  
38 cell resolution the complex composition and dynamic changes that occur over time in the non-  
39 epithelial stromal compartment. We detail across different developmental stages in human and  
40 mouse thymus, and in an experimental model of Di George syndrome, the most common form of  
41 human thymic hypoplasia, the separate transcriptomes of mouse mesothelium, fibroblasts, neural  
42 crest cells, endothelial and vascular mural cells. The detected gene expression signatures identify  
43 novel stromal subtypes and relate their individual molecular profiles to separate differentiation  
44 trajectories and functions. Specifically, we demonstrate an abundance and unprecedented  
45 heterogeneity of diverse fibroblast subtypes that emerge at discrete developmental stages and vary  
46 in their expression of key regulatory signalling circuits and components of the extracellular  
47 matrix. Taken together, these findings highlight the dynamic complexity of the non-epithelial  
48 thymus stroma and link the cells' specific gene expression profiles to separate instructive roles  
49 essential for normal thymus organogenesis and tissue maintenance.

50

51 **Teaser**

52

53 Single cell profiling of thymic stroma identifies a dynamic contribution from neural crest cells to  
54 the thymic mesenchyme.

55

56

## 57 **Introduction**

58

59 Thymic T cell lineage commitment, development, maturation, and repertoire selection are  
60 instructed by a stromal scaffold that includes thymic epithelial cells (TEC) (1), endothelial cells  
61 (2) and mesenchymal cells (3, 4). The TEC compartment is both phenotypically and  
62 transcriptionally well characterized providing at single cell resolution a detailed account of the  
63 cells' developmental dynamics and functions (5, 6). In addition, the thymus microenvironment is  
64 also composed of stromal cells of mesenchymal origin, including fibroblasts, endothelial cells and  
65 vascular mural cells. Derived primarily from either mesoderm or ectodermal neural crest cells,  
66 these thymic mesenchymal cells interact with TEC and thus create unique cellular niches that  
67 control thymopoiesis. This critical function of mesenchymal cells is accomplished via the  
68 production of extracellular matrix components, morphogens and key growth factors (3, 4, 7).  
69 Hence, the thymic mesenchyme is indispensable for the organ's correct formation and function (1,  
70 7, 8).

71

72 Fibroblasts constitute the largest component of the non-epithelial thymus stroma. (NETS) Though  
73 first described as distinct cell type over 150 years ago, the specific contributions of fibroblasts to  
74 organ formation, maintenance and function have only recently begun to be unraveled (8).  
75 Utilizing single-cell genomic technologies for the comparison of diverse tissues, fibroblasts were  
76 noted to display a significant heterogeneity with both cross-organ communalities and tissue-  
77 specific differences (9). Likewise, endothelial cells and vascular mural cells display organotypic  
78 features that have only recently been appreciated when resolving the cells' distinct transcriptomes  
79 at single-cell resolution (10). In addition to their essential role in providing oxygen, nutrients,  
80 cells and other cargo to tissues, blood vessels also express in a context-specific fashion diverse  
81 transcriptomic profiles that include sets of growth factors inducing, specifying, patterning, and  
82 guiding organ formation and homeostasis (11). A third stromal component of non-epithelial  
83 origin are neural crest cells which enter the anlage as a migratory population as early as  
84 embryonic day 12 where they differentiate into distinct cell types, including vasculature-  
85 associated pericytes juxtaposed between endothelia and the other components of the stromal  
86 scaffold (12).

87

88 A detailed phenotypic, transcriptomic, and functional genomic description of the diverse  
89 population of non-epithelial thymus stromal cells is to date still wanting. We have therefore  
90 employed flow cytometry and single cell multiomics technologies to detail the complexity and  
91 developmental dynamics of thymic mesenchymal cells in both mouse and human tissue. Our  
92 results highlight a previously unappreciated heterogeneity among cells belonging to the NETS  
93 under physiological conditions and identify distinct yet selective defects of these cells in a genetic  
94 mouse model of the 22q11 deletion syndrome, the most common human condition associated  
95 with congenital thymus hypoplasia.

96

97

98

## 99 Results

### 100 Single cell sequencing reveals high levels of complexity within the thymic mesenchyme

101 We first sought to delineate both the frequency and diversity of NETS cells (phenotypically  
102 defined as Ter119<sup>-</sup>CD45<sup>-</sup>EpCAM<sup>+</sup>) in the thymus of 4-week-old mice. These cells accounted for  
103 approximately half of the total thymus stroma cellularity and distinct subpopulations were  
104 identified using the differential expression of glutamyl aminopeptidase Ly51, glycoprotein  
105 podoplanin (gp38) and dipeptidyl peptidase-4 (DPP4, CD26) (Fig. 1a and Fig. S1a) (3, 13). The  
106 Ly51<sup>hi</sup>gp38<sup>-</sup> phenotype identified neural crest-derived pericytes which surround blood vessels  
107 adjacent to endothelial cells (4, 12). The gp38 positive stromal cells expressed a reduced level of  
108 Ly51 and could be further differentiated into separate subpopulations based on their CD26  
109 expression: gp38<sup>+</sup>CD26<sup>+</sup> cells localized to the thymus capsule whereas gp38<sup>+</sup>CD26<sup>-</sup> were  
110 enriched in the medulla (Fig. 1b) (13).

111 To delineate the heterogeneity of the thymic mesenchyme in an unbiased fashion and independent  
112 of a limited number of phenotypic markers, we next generated transcriptomic libraries from 5,878  
113 single Ter119<sup>-</sup>CD45<sup>-</sup>EpCAM<sup>+</sup> cells isolated from 4-week old thymi (Extended Data Fig. 1a). We  
114 identified 12 distinct cell subtypes based on their separate gene expression profiles (Fig. 1c, d,  
115 Fig. S1b). (For clarity, we refer to transcriptionally defined stromal cell clusters as subtypes  
116 whereas the terms populations and subpopulations specify cells that have been defined by  
117 cytometry). A Uniform Manifold Approximation and Projection (UMAP) analysis of non-TEC  
118 stroma identified four separate cell clusters of different sizes. The two largest comprised several  
119 individual cell subtypes that were transcriptomically defined as either capsular or medullary  
120 fibroblasts (Fig. 1c and Fig. S1c i and ii) (13). The capsular cluster closely resembling the gene  
121 expression profile of capsular fibroblasts consisted of four subsets that separated from mesothelial  
122 cells defined – *inter alia* - by their expression of *Msln* and *Upk3b*, encoding the  
123 glycosylphosphatidylinositol-anchored cell-surface adhesion protein mesothelin and the  
124 membrane integral protein Uroplakin, respectively (14). Within the capsular fibroblast clusters,  
125 subtype 1 (designated CapFb1) was characterized by the high expression of *Svep1*, *Sfrp1* and  
126 *Dpep1*, which encode a multidomain cellular adhesion molecule (15), the secreted frizzled-related  
127 protein 1 modulating stromal to epithelial signaling via Wnt inhibition (16), and a membrane-  
128 bound dipeptidase involved in the metabolism of glutathione and other similar proteins (17). The  
129 capsular subtypes 2 (CapFb2) and 4 (CapFb4) were characterized by the expression of *Pil6*,  
130 *Mfap5* and *Fstl1*, which encode a peptidase inhibitor of largely unknown function, the  
131 microfibrillar-associated protein 5 related to extracellular matrix remodeling and inflammation  
132 (18), and the secreted extracellular glycoprotein follistatin-like 1. CapFb4 also highly expressed  
133 *Timp2* encoding the tissue inhibitor of metalloproteinase 2 relevant for tissue remodeling (19),  
134 *Anxa3* translating into the membrane-associated Annexin 3 protein activating the epithelial-to-  
135 mesenchymal transition (EMT) program and Wnt signaling pathway (20), and *Fbn1* encoding  
136 Fibrillin 1, a major component of extracellular microfibrils. The CapFb3 subtype typically  
137 expressed *Igf1* encoding Insulin-growth factor 1 regulating tissue homeostasis via cell  
138 proliferation, differentiation, maturation, and survival (21), *Gdf10* translating into the  
139 transforming growth factor- $\beta$  (TGF- $\beta$ ) superfamily member growth differentiation factor-10  
140 (GDF10) (22), and *Olfml3* encoding the secreted glycoprotein olfactomedin-like 3 which has  
141 matrix-related functions central to embryonic development (23).

142 The second UMAP cluster incorporated two distinct medullary fibroblast subtypes, pericytes and  
143 vascular smooth muscle cells. The medullary fibroblast subtypes 1 (MedFb1) and 2 (MedFb2)  
144 displayed similar gene expression profiles although transcripts for the out-at-first protein  
145

149 (encoded by *Oaf*) and the alpha 1 chain of collagen XV (*Col15a1*) were detected at higher levels  
150 in MedFb1 while transcripts for extracellular superoxide dismutase 3 (*Sod3*) were particularly  
151 evident in MedFb2. Both subtypes also comprised transcripts for IL-33 and Cxcl16, which are  
152 important for dendritic cell activation and NKT cell migration, respectively (24, 25). Transcripts  
153 related to antigen processing and presentation were enriched in MedFb2 (Fig. S1b). However,  
154 contrary to a recent observation (13), tissue restricted antigens were not generally more frequent  
155 in medullary fibroblasts when compared to other thymic NETS (Fig. S1e).

156  
157 Pericytes were identified by their characteristic expression of *Kcnj8* encoding member 8 of the J  
158 subfamily of the potassium inwardly rectifying channels, which form part of the ATP/ADP-  
159 binding potassium channel of these cells (26). Vascular smooth muscle cells (VSM) were  
160 characterized by the expression of contractile elements, including *Acta2*, *Tpm1* and *Myh11*,  
161 whereas endothelial cells displayed a high number of transcripts for *Gpihbp1* and *Pecam1* which  
162 encode the glycosylphosphatidylinositol anchored high density lipoprotein binding protein 1 and  
163 the intercellular junction protein platelet and endothelial cell adhesion molecule (PCAM, aka  
164 CD31), respectively. Neural crest-derived cells (NCC) were characterized by their expression of  
165 *Foxd3* and *Sox10* which are critical for the cells' specification and development (27, 28). Finally,  
166 actively proliferating cells were identified by the expression of different cell cycle-related genes  
167 including *Mki67* encoding the nuclear protein Ki67.

168  
169 We determined the gene expression profiles of the 4 FACS-defined non-TEC thymic stromal  
170 subpopulations (Fig. S1a) and deconvoluted the individual transcriptomes by projection onto the  
171 single cell UMAP data (Fig. 1e, Table 1). Stroma cells expressing CD31 identified the cluster  
172 defined as endothelial cells and the Ly51<sup>+</sup>Gp38<sup>-</sup> subpopulation represented the pericyte and  
173 vascular smooth muscle cell clusters (Fig. 1e, f). The gp38<sup>+</sup>CD26<sup>+</sup> subpopulation included all of  
174 the 4 capsular fibroblasts subtypes, whereas the gp38<sup>+</sup>CD26<sup>-</sup> subpopulation was mainly enriched  
175 for the medullary fibroblast subtypes but also included CapFb1 cells (Fig. 1e, f). We showed that  
176 this fibroblast heterogeneity patterned the thymic extracellular matrix by staining for two key  
177 extracellular matrix molecules (type I collagens and fibronectin), which were most highly  
178 expressed in capsular fibroblasts (Fig. 1g).

179 Hence, the single cell RNA-seq based identification of thymic stromal cells unmasked a  
180 previously unrecognized heterogeneity of individual subsets among gp38<sup>+</sup> NETS which could not  
181 be identified by conventional flowcytometry-based phenotyping.

182

### 183 **Thymic organogenesis is characterised by dynamic mesenchymal changes**

184

185 The thymus undergoes significant micro-architectural changes during organogenesis, including  
186 the compartmentalisation into distinct cortical and medullary domains and the formation of a  
187 complex vascular network (29). We therefore investigated how these morphological changes  
188 paralleled compositional alterations of the mesenchymal stroma (Fig. 2a-b). At embryonic day  
189 (E)12.5, NETS accounted for more than 90% of all CD45<sup>-</sup> thymic cells with Ly51<sup>+</sup>gp38<sup>-</sup> cells  
190 being by far the most dominant subpopulation. The frequency of TEC gradually increased parallel  
191 to thymus growth and reached a relative maximum at E16.5 when epithelia represented 60% of  
192 the thymic stroma. Earlier during thymus organogenesis, the non-TEC stroma lacked the  
193 heterogeneity observed at E16.5 and thereafter. For example, gp38<sup>+</sup>CD26<sup>-</sup> and gp38<sup>+</sup>CD26<sup>-</sup>  
194 fibroblasts dominated the stromal compartment at both E12.5 and E13.5, endothelial cells were  
195 only discovered at E13.5 and Ly51<sup>+</sup>gp38<sup>-</sup> pericytes were not detected prior to E16.5 (Fig. 2a, Fig.  
196 S2a). The subpopulation of gp38<sup>+</sup>CD26<sup>+</sup> capsular fibroblasts was identified as early as E13.5 and  
197 increased in frequency thereafter (Fig. 2a).

198

199 We next used single cell RNA-seq to detail changes in the heterogeneity of individual NETS  
200 subtypes and to determine the cells' developmental trajectories. We generated libraries on a total  
201 of 36,208 single stromal cells isolated from embryonic (E12.5, 13.5, 16.5), new-born and young  
202 adult thymus tissue, which collectively reiterated the clusters observed in the thymus of 4-week-  
203 old mice and provided sufficient resolution to identify additional heterogeneity (Fig. 2b-d, Table  
204 1). Complex dynamic changes in the frequency of individual subtypes occurred over time  
205 between the early developmental stages and the completion of a mature thymus  
206 microenvironment. For example, CapFb1a and CapFb2b appeared early but their frequencies  
207 gradually decreased during organogenesis whereas all of the medullary fibroblasts (with the  
208 notable exception of MedFb1a) increased parallel to the emergence of mTEC (30). NCC were  
209 largely absent after E16.5 but other NETS subtypes remained either mainly unchanged or  
210 displayed a bi-model variation in frequency between E12.5 and 4 weeks of age (Fig. 2c i and ii).  
211 This finding is in agreement with lineage tracing studies demonstrating the cells' developmental  
212 potential to differentiate into VSM and pericytes.(12, 31) Thus, single cell RNA-seq revealed  
213 complex and dynamic changes in the relative number of individual NETS subtypes that would be  
214 captured incompletely by classical cell surface phenotyping, such as CD26 (Fig. S2b).

215  
216 We leveraged the splicing information obtained from single cell transcriptomes to determine the  
217 developmental trajectories of individual NETS subtypes. This analysis identified the CapFb1a and  
218 CapFb2b subtypes as the principal precursors for other capsular fibroblasts (Fig. 2d) and  
219 suggested MedFb1a to serve as a precursor for other fibroblast subtypes in the emerging medulla  
220 (30). This analysis also recognized CapFb3 fibroblasts as intermediates between mesothelial cells  
221 and other fibroblast subtypes, a finding consistent with the concept that fibroblasts can be derived  
222 from mesothelial cells (32). However, CapFb3 were distinct from mesothelia as they lacked the  
223 expression of *Msln* and *Upk3b* (Fig. 1d) (14).

224  
225 The single cell transcriptome data was also used to infer gene regulatory network activities of  
226 individual NETS subtypes (Fig. 2e). A transcription factor motif analysis of these gene regulatory  
227 networks was executed to identify potential cell type-specific transcription factors (33). In  
228 keeping with their proposed differentiation from mesothelial cells, CapFb3 fibroblasts expressed  
229 gene regulatory networks controlled by the transcription factors *Hoxa5* and *Wt1*, which typically  
230 are active in mesothelial cells (Fig. 2e, Fig. S2c) (14). CapFb4 were highly enriched for a *Creb5*-  
231 controlled gene regulatory network that has previously been identify to modulates the  
232 differentiation of fibroblasts to myofibroblasts (34) and to control age-related thymic fibrosis (35)  
233 (Fig. S2d). MedFb2b expressed *Irf7* encoding the Interferon-regulatory factor 7 (IRF7), a master  
234 regulator of type I IFN secretion that interacts with Smad3 to regulate TGF- $\beta$  signalling for  
235 collagen production (Fig. 2e, Fig. S2e) (36).

236  
237 We assessed the expression of canonical Wnt signalling transcripts and growth factors known to  
238 be important in thymic stromal interactions with thymocytes (Fig. S3) (37). Several Wnt ligands  
239 displayed distinct expression patterns among cells of the NETS. For example, *Wnt4* transcripts  
240 were detected in mesothelium, *Wnt5a* in CapFb2b, CapFb3 and CapFb4, *Wnt6* in NCC, and  
241 *Wnt10b* in CapFb4. Wnt modulators were also highly expressed in particular non-epithelial  
242 stroma cells, including *Rspo1* in mesothelium and *Sfrp5* in NCC. Several cell subtypes of the  
243 NETS acted as prominent sources of key growth factors, including *Bmp4* transcribed in CapFb1c,  
244 *Bmp7* in CapFb4 and mesothelium, *Fgf10* in CapFb1a, CapFb1b and CapFb1c, and *Tgfb1* in  
245 endothelial cells. In keeping with their role in regulating the extracellular matrix, fibroblast  
246 subtypes showed high expression of key extracellular matrix transcripts, with collagens (*e.g.*  
247 *Colla2*, *Col3a1* and *Coll4a1*) primarily expressed in capsular fibroblasts, and laminins (*Lama2*  
248 and *Lama4*) in a mixture of capsular (CapFb1a, CapFb1b and CapFb1c) and medullary fibroblasts

249 (MedFb1b and MedFb2b). This distinctive expression of growth and differentiation factors, and  
250 components of the extracellular matrix demonstrated that heterogeneity within the NETS  
251 compartment determined modularity in the expression of key molecules, thus implicating  
252 different developmental and functional niches.

253

### 254 **Ligand-receptor pairing analysis identifies interactions between neural crest-derived** 255 **mesenchyme and endothelial cells**

256

257 Given that NCCs are known to differentiate into perivascular cell types, we aimed to uncover the  
258 ligand-receptor signaling and the subsequent transcriptomic networks that control the  
259 differentiation of NCCs into pericytes and VSM and pericytes (12, 31). To this end, NicheNet  
260 identified intercellular ligand-receptor interactions associated with cell type-specific transitions  
261 across early (E12.5 and E13.5) to later stages (E16.5) in embryonic thymus formation (38). This  
262 analysis demonstrated that ligands expressed by endothelial cells, including the adhesive and  
263 multimeric glycoprotein von Willebrand factor (vWF) and Transforming Growth Factor Beta 1  
264 (TGFB1), influenced gene expression in thymic NCC (Fig. 3a, b). Conversely, heterotypic  
265 interactions between junctional adhesion molecule-3 (*Jam3*) produced by NCC and its receptor  
266 *Jam2* on endothelial cells identified a candidate ligand-receptor pair that orchestrated the changes  
267 in the gene expression profile of embryonic endothelial cells (Fig. 3c). Together, these inferred  
268 ligand-receptor interactions suggested that reciprocal cellular relationships between vascular  
269 structures and NCC shape the perivascular thymic stroma during embryogenesis.

270

### 271 **Reduced cellularity and complexity of mesenchymal stroma are features of an experimental** 272 **22q.11.2 Deletion Syndrome model**

273

274 A spontaneously occurring heterozygous deletions of 1.5Mb to 3Mb size following recombination  
275 between four blocks of low copy repeats within 22q11.2 account for the loss of up to 106 genes  
276 (39). This mutation constitutes the most common molecular etiology of the 22q11.2 deletion  
277 syndrome (DS; previously referred to as DiGeorge Syndrome (DGS)) which manifests clinically  
278 as a range of features that include either athymia resulting in T cell deficiency or thymus  
279 hypoplasia compromising immunological fitness (39). Regions of mouse chromosome 16 are  
280 syntenic to the human 22q11.2 (40) and include *Tbx1*, encoding a T-box transcription factor and  
281 *Crkl*, encoding an adapter protein implicated in fibroblast growth factor and focal cell adhesion  
282 signaling (39). Compound haploinsufficiency of *Tbx1* and *Crkl* in mice results in typical  
283 hallmarks of 22q11.2DS, including thymic hypoplasia (41).

284

285 The abnormal migration of cephalic NCC has been identified as a possible cause for the  
286 pharyngeal patterning defects observed in 22q11.2DS which is recapitulated in mice compound  
287 heterozygous for *Tbx1* and *Crkl* (designated *Tbx1<sup>+/-</sup>Crkl<sup>+/-</sup>*). Gene products of these two loci have  
288 been alleged to interact in a dosage-sensitive fashion (41). *Tbx1* expression in NETS was  
289 exclusively confined to E12.5 and detected in a subset of cortical fibroblast subtypes, especially  
290 CapFb4, and proliferating cells. Yet, *Crkl* transcripts were mainly detected in CapFb1 and  
291 CapFb4 subtypes early during thymus development but could also be identified in a small fraction  
292 of these and other NETS later in development (Fig. S4a-c).

293

294 The thymi of mice compound heterozygous for a loss of *Tbx1* and *Crkl* were hypoplastic and  
295 revealed already at E13.5 significantly fewer haematopoietic, epithelial and mesenchymal cells  
296 than their wild type controls, which was not the case for either single *Tbx1* or *Crkl* mutants (Fig.  
297 4a-c and Fig. S4d). At birth, hematopoietic cells and all phenotypically identified major NETS  
298 subpopulations were reduced in mutant mice and remained diminished in 4-week-old mice with

299 the notable exception of gp38<sup>+</sup>CD26<sup>+</sup> capsular fibroblasts. In contrast, the cellularity of TEC and  
300 endothelial cells varied over time and were not uniformly reduced in mutant mice at these times  
301 (Fig. 4b, c; Fig. S4e). Thus, several NETS subpopulations were consistently reduced in mice  
302 heterozygous for *Tbx1* and *Crkl*.

303  
304 We next compared the transcriptome of individual epithelial and NETS cells isolated from new-  
305 born *Tbx1*<sup>+/-</sup>*Crkl*<sup>+/-</sup> mice (Fig. 5a and Fig. S5a; epithelial and non-epithelial stromal cells were  
306 annotated as previously published (5) and shown in Figure 2, respectively). *Tbx1* and *Crkl*  
307 compound heterozygosity substantially changed the composition of the thymus stroma resulting  
308 in a reduction of 8 of the 18 individual subtypes in *Tbx1*<sup>+/-</sup>*Crkl*<sup>+/-</sup> mice. Specifically and in  
309 contrast to the results obtained by flow cytometry, the relative cellularity of several capsular and  
310 medullary fibroblast subtypes together with that of pericytes and VSM was lessened (Fig. 5b). In  
311 addition, the frequencies of mature cortical (mcTEC) and intertypical TEC (itTEC) were reduced  
312 in mutant mice whereas that of perinatal cortical TEC (pcTEC), post-Aire mTEC (pamTEC) and  
313 neural TEC (nTEC) were enriched (Fig. 5c).

314  
315 To assess the functional consequences of a compound heterozygous loss of *Crkl* and *Tbx1*, we  
316 performed an enrichment analysis for differentially expressed gene sets (Fig. 5d, Fig S5b). This  
317 analysis revealed that transcripts for gene products relevant for cell migration were reduced in  
318 several capsular and medullary fibroblast as well as in pericytes. In VSM, fewer transcripts for  
319 contractile elements (e.g. *Myl6* and *Tpm2*; Fig 5d) were observed.

### 321 **Compound *Tbx1* and *Crkl* heterozygosity is associated with accelerated aging of thymic** 322 **mesenchyme**

323  
324 22q11DS patients display an accelerated thymic senescence (42), a process implicated to be  
325 caused by an age-dependent chronic systemic inflammatory condition known as inflammaging  
326 (43). To appraise the effects of inflammaging on NETS, we applied to our data an ageing score  
327 computed from age-driven transcriptomic changes common across many tissues (44). In contrast  
328 to the heterogeneous effect of ageing on TEC subsets (5), the ageing module score of non-TEC  
329 stroma progressively increased from early embryonic stages to young adulthood (Fig. 6a). These  
330 changes demonstrated a switch from an abundant expression of transcripts belonging to  
331 biosynthetic pathways to gene products associated with angiogenesis and immunological  
332 crosstalk (Fig. S6a).

333  
334 Altered transcription factor network activity has been linked to the process of senescence (44).  
335 Using the transcriptomes from NETS isolated from mice at different ages, a decrease in  
336 transcripts related to gene networks controlled by Sox 4 and its close relative Sox11 were  
337 observed. In parallel, gene networks controlled by IRF7 were gradually activated over time and  
338 beyond what would be expected from their enrichment in MedFb2b subsets (Fig. 6b and Fig.  
339 S2e). In contrast, *Fos* and *Fosb* controlled gene networks peaked at birth but were subsequently  
340 weakened (Fig. S6b), a pattern previously noted in other tissues (45).

341  
342 The ageing module score analysis was extended to include thymic stromal cells isolated from  
343 *Tbx1*<sup>+/-</sup>*Crkl*<sup>+/-</sup> mice at postnatal day 0. Accelerated aging (as discernible by an increased score)  
344 was noted in mutant mice for the population of mesenchymal but not endothelial and epithelial  
345 cells (Figure 6c). Within the mesenchymal compartment, accelerated aging was not uniform as an  
346 increased score was observed in only 7 of the 19 distinct stromal subtypes including pericytes,  
347 VSM and 2 cortical and medullary fibroblast subtypes (Figure 6d). Hence, these studies showed  
348 age-related transcriptomic changes across distinct NETS subtypes of *Tbx1*<sup>+/-</sup> *Crkl*<sup>+/-</sup> mice.



349 Although there was only a very small number of NCCs present at postnatal day 0 in either wild  
350 type or *Tbx1*<sup>+/-</sup>*Crkl*<sup>+/-</sup> mice, NCCs migration and differentiation are known to be impaired in  
351 22q.11.2 Deletion Syndrome (46). It is therefore possible that the alterations within the NETS  
352 compartment observed in *Tbx1*<sup>+/-</sup>*Crkl*<sup>+/-</sup> mice may be driven by aberrant differentiation of NCCs  
353 into mesenchymal cells, particularly perivascular cell types (31).

### 354 355 **Neural crest cells differentiate into perivascular cells in the human prenatal thymus**

356  
357 To extend the analysis of the thymus stroma to human tissue, we used single NETS nuclei to  
358 investigate their gene expression profiles and correlated these to chromatin accessibility. For this  
359 purpose, we employed a multiomics analysis that investigated 528 individual non-TEC thymic  
360 stroma nuclei isolated from two donors at 14- and 17-weeks post-conception (Fig. S7 and S8).  
361 This analysis identified seven distinct cell clusters, corresponding to NCCs (NCC-I and NCC-II),  
362 capsular fibroblasts, VSM, endothelial cells, medullary fibroblasts and pericytes. The frequency  
363 of cells in cluster 6 increased from 14- to 17-weeks post-conception, whereas the frequency of  
364 those in clusters 3 and 5 decreased within that time span (Fig. S9). We found the expected  
365 gradients in *PDGFRA* and *PDGFRB* expression across clusters composed of fibroblasts, pericytes  
366 and VSM (Fig. 7a) and *PECAMI* expression in endothelial cells (Fig. 7b).

367  
368 Given the dynamic changes in NCC frequency in the thymus over development and the changes  
369 observed in NCC-derived perivascular structures in *Tbx1*<sup>+/-</sup>*Crkl*<sup>+/-</sup> thymi, we focused further on  
370 the chromatin and transcriptomic landscape of the NCC subclusters. NCC development is  
371 understood as a stepwise series of bifurcating cell fate decisions that lead to multiple cell  
372 identities and traits (47). Once specified in their fate, NCCs undergo an epithelial-to-  
373 mesenchymal transition and migrate throughout the embryo. NCC-II showed genome-wide high  
374 accessibility for sequences with SOX10 transcription factor binding motifs whereas the NCC-I  
375 displayed only an intermediate degree of accessibility for this motif (Fig. S10).

376  
377 To further investigate the dynamics of SOX10 activity, we integrated gene expression profiles  
378 with chromatin accessibility in single cells to identify key enhancer-TSS interactions driving  
379 *SOX10* expression in human NCCs (Fig. 7c). We identified two sequences, which corresponded  
380 to two upstream orthologous enhancer elements (called U2 and U3) previously implicated in the  
381 control of *SOX10* expression in mouse NCCs and their progeny (48). Having identified that  
382 *SOX10* regulation was shared throughout the two NCC subclusters, we further examined  
383 heterogeneity amongst these NCCs to establish whether these could represent NCCs in different  
384 states of differentiation.

385  
386 The comparative analysis of the gene expression profiles among the two NCC subclusters  
387 revealed an enrichment of gene pathways associated with cellular motility and vascular  
388 development for NCC-I (e.g. *BCL2*, *FGF13* and *RHOJ*; Fig. S11a). In contrast, NCC-II was  
389 enriched for gene pathways related to neuronal development and thus marked cells with gene  
390 expression profiles characteristic of bona fide NCC (e.g. *NES*, *NCAM2* and *GRID2*; Fig. S11a).  
391 This difference in gene expression profiles suggested that NCC-I may constitute a population of  
392 NCCs differentiating into mesenchymal and perivascular cell types. In support of this notion,  
393 NCC-II showed in comparison to NCC-I a significantly higher expression of *TFAP2A*, a key  
394 transcription factor in early NCC development, whereas *NR2F2*, a transcription factor involved in  
395 NCC migration, was most highly expressed in NCC-I (Fig. S11b) (49). Hence, the multiomics  
396 analysis of NES cells in human thymi captured the process of NCC differentiation into other cell  
397 types, a finding that could not be observed in mouse thymic stromal samples analyzed in this  
398 study.



## 400 Discussion

401  
402 Stromal cells with separate functions emerge from all germ-layers during development to  
403 populate organs where they instruct the tissue's essential activities, for example via the  
404 differential production of extracellular matrix components, the release of growth and  
405 differentiation factors, and the creation of signalling niches that provide critical molecular cues  
406 (50). In addition to cross-organ communalities, stromal cells with seemingly identical phenotypes  
407 also display a heterogeneity both within and across tissues as revealed by dissimilarities in  
408 transcripts encoding pathway elements, transporters and cell-surface markers (51). Previous  
409 studies of the thymic stroma in both mice and humans could identify only a limited number of  
410 phenotypically distinct thymic mesenchyme subtypes (13, 37, 52) despite the cells' acknowledged  
411 roles as critical components in maintaining tissue structure and TEC function (7).

412  
413 Employing gene expression profiles at single cell resolution, we now show an unprecedented  
414 heterogeneity among thymic mesenchymal cells and identify dynamic changes in the frequency of  
415 these cells across a large range of developmental stages. Notably, the observed diversity is not  
416 replicated using flow cytometry as separate since transcriptionally defined stromal subtypes  
417 display identical phenotypic features due to a limited number of suitable cell surface markers.  
418 This limitation has hindered a comprehensive understanding of how non-epithelial thymic stromal  
419 cells contribute to local tissue microenvironments which control discrete stages of intrathymic T  
420 cell differentiation.

421  
422 Early in development, the thymus stroma is mostly composed of cells belonging to the NETS and,  
423 with the notable exception of NCC, continue to structure the scaffold also in adult mice where  
424 they contribute together with TEC to the non-haematopoietic stroma. We identify within the  
425 NETS separate cell types as decoded by unique transcriptional fingerprints, including endothelial  
426 cells, vascular mural cells, NCCs, mesothelial cells and fibroblasts. Among the fibroblast  
427 population, at least 11 distinct capsular and medullary subtypes are recognized, thus largely  
428 extending the previously identified heterogeneity defined mostly by phenotypic markers and bulk  
429 RNA sequencing (13, 37, 52). These subtypes display dynamic changes in their relative  
430 representation over time and demonstrate RNA splicing patterns that identify CapFb1a, CapFb2b  
431 and MedFb1a as fibroblast subtypes with precursor potential and CapFb3 to originate from  
432 mesothelial cells as this fibroblast subtype continues to express several mesothelium-specific  
433 biomarkers, including *Wt1*, *Cxcl13* and *Rspo1* (Fig. S12; ref. (14)).

434  
435 Cells with gene expression profiles typical of arterial, capillary and venous vasculature are  
436 detected already at embryonic day E12.5 when the colonization of the thymus by haematopoietic  
437 precursor cells has been initiated independent of an established vasculature (53). After E15.5, the  
438 frequency of pericytes and vascular smooth muscle cells increases which coincides with the  
439 histological evidence of vessel formation. The gate keeper molecules P-selectin, ICAM-1,  
440 VCAM-1 and CCL25 enable the entry of T cell precursor into the thymic microenvironment and  
441 we find these molecules expressed by all thymic endothelia in the postnatal thymus (54). The  
442 expression level of the adhesion molecules increases parallel to the age of the mouse but differs  
443 between distinct anatomical sites along the vasculature (Fig. S13). This expression pattern  
444 specifies that T cell precursors enter the thymic microenvironment via postcapillary venules in a  
445 gated and temporally-controlled way (55) and that the efficiency of this process may differ  
446 between developmental stages. The further development of these haematopoietic cells is regulated  
447 by membrane bound Kit ligand which we find expressed by all endothelia and thus also at those  
448 anatomical locations where haematopoietic precursors enter the thymus microenvironment (Fig.  
449 S12).

450

451 Endothelial cells also regulate in a non-redundant fashion the egress of mature thymocytes via the  
452 expression of sphingosine-1-phosphate (S1P) lyase (encoded by *Sgpl1*), lipid phosphate  
453 phosphatase 3 (*Pllp3*) and spinster homologue 2 (*Spns2*) that modify S1P availability and enable  
454 the molecular transport, respectively (56-58). Transcripts for *Ppl3* and *Spns1* are detected in all  
455 endothelial cell types even paradoxically at a time of development when T cell export has not yet  
456 commenced (Fig. S13). This expression pattern designates the anatomical site from where  
457 thymocytes can exit and indorses the molecular mechanism by which this process is controlled  
458 (59).

459

460 The NETS collectively promotes the proliferation and differentiation of TEC either indirectly via  
461 ligands that engage for example the platelet-derived growth factor receptor-alpha (PDGFR $\alpha$ ) (60)  
462 or directly via different signalling ligands, including Wnts, BMP4, Fgf7 and Fgf10 (3, 61, 62).  
463 For example, BMP is expressed by CapFb1c together with Fgf10 and upregulates FOXN1, a  
464 transcription factor indispensable for TEC differentiation and function (61-63). Wnt4 which also  
465 stimulates the up-regulation of FOXN1 both in an auto- and paracrine way is not expressed by  
466 any of the identified thymic fibroblast subtypes but detected in mesothelial cells, thymocytes and  
467 epithelia within the thymus (62, 64). Moreover, three of the four capsular fibroblast subtypes  
468 express a range of Wnt ligands albeit none that had previously been implicated in stimulating  
469 FOXN1 expression. The transcriptome of individual thymic fibroblast subtypes also infers that  
470 Wnt-mediated signals are furthermore either positively modulated by R-Spondin 1 secreted by  
471 mesothelia or negatively delimited by Kremen and Dickkopf-1 which are expressed by other  
472 cellular components within the stroma (65, 66). Moreover, CapFb4 fibroblasts which express  
473 endosialin (*CD248*) have previously been implicated in the maintenance and regeneration of TEC  
474 (67).

475

476 A major feature of fibroblasts is their capacity to express extracellular matrix components which  
477 form scaffolds that differ regionally in their composition, shape, biophysical characteristics and  
478 functions (50). The heterogeneity and distinct spatial distribution of individual stromal cells  
479 therefore accounts for the diverse properties of the extracellular matrix with collagen expression  
480 restricted to capsular fibroblasts and transcripts for laminins detected more widely across capsular  
481 and medullary fibroblast subtypes (Fig. S3). Patterning of the extracellular matrix is critical in  
482 supporting thymic organogenesis, suggesting that thymic mesenchymal diversity will likely have  
483 a broad impact on thymic *in vivo* function (8).

484

485 Single cell sequencing of human thymus tissue identifies a heterogeneity among NETS that is  
486 similar to the variance observed in mice and thus constitutes a trans-species phenomenon (37, 52).  
487 Surprisingly, a relatively large population of NCCs is still detected at 14- and 17-weeks post-  
488 conception, i.e. at a time when thymus morphogenesis has ended and full function has been  
489 attained (68). This finding thus contrasts the results observed in mouse tissue at a corresponding  
490 developmental stage since the thymus of mice largely lacks NCCs as early as E16.5. This  
491 incongruity suggests that contrary to mice human NCCs have a more enduring role in shaping the  
492 NETS compartment. The analysis of human thymus tissue at late foetal stages of thymus  
493 organogenesis reveals two distinct NCC subtypes each with a seemingly different developmental  
494 potential, bespoke chromatin accessibility and proliferation dynamics. One of the two NCC  
495 subtypes, i.e. NCC-I, represents a subtype that is poised to adopt a mesenchymal and perivascular  
496 cell fate. Notably, the corresponding cell type is not identified in the mouse thymus. This  
497 suggests that the transition between neural crest-derived cells and perivascular cells in mice must  
498 either be rapid and profound, or, alternatively, occurs at an embryonic time-point that is not

499 captured in our dataset as the lineage mapping of NCCs has previously identified their  
500 differentiation into VSM and pericytes(12, 31).

501  
502 The murine model of 22q11DS reveals major quantitative and qualitative changes in the thymus  
503 stroma which for the first time are highlighted by a decreased proportional representation of  
504 several TEC subtypes and mesenchymal cells, the latter including a selection of capsular and  
505 medullary fibroblasts and the NCC-derived pericytes and VSM. However, *Tbx1* and *Crkl*  
506 transcripts are only solidly detected in a selection of mouse thymus fibroblast subtypes at the  
507 earliest stages of organogenesis and are notably absent in thymic NCCs. Indeed, NCCs retain  
508 their relative frequency in the presence of compound *Crkl* and *Tbx1* haploinsufficiency. Hence,  
509 the observed modifications in vascular mural cells are not the result of a reduced thymic NCC  
510 frequency or changes in *Crkl* and *Tbx*-controlled gene expression in these cells having migrated to  
511 the thymus. Rather, our data suggests that they are the consequence of altered TGF $\beta$  receptor  
512 mediated signalling in pericytes, VSM and likely their immediate precursors as this requires the  
513 involvement of *Crkl*, with *Tgfb1* expressed by endothelial cells and *Tgfb3* by capsular fibroblasts  
514 (Fig. S14) (69). Yet, the absence of normal *Crkl*-dependent signalling in different  
515 haploinsufficient fibroblast subtypes may in addition and indirectly impair pericytes and VSM  
516 development, thus arguing for a hitherto unexplored aspect of intra-thymic cellular crosstalk.

517  
518 Overall, our findings have identified previously underappreciated levels of cellular heterogeneity  
519 and developmental dynamics within the non-TEC thymic stromal compartment. Cellular diversity  
520 within this compartment is present both in murine and human thymic development, but shows  
521 clear trans-species differences worthy of further investigation. Many of these cell populations are  
522 disrupted in 22q11.2 DS, a syndrome known to cause defective thymic organogenesis and  
523 function. Further work should focus on identifying the precise function of each fibroblast cell  
524 subpopulation, along with their contribution to overall thymic development and function.  
525

## 526 **Materials and Methods**

527

### 528 **Mice**

529

530 All mice were maintained under specific pathogen free conditions and according to United  
531 Kingdom Home Office regulations and federal regulations and permissions, depending on where  
532 the mice were housed. Wild-type C57BL/6 mice originated were bred in-house. A mouse line  
533 carrying a germ-line Crkl null allele (Crkl<sup>tm1d(EUCOMM)Hmgu/ImoJ</sup>) was generated with Cre-  
534 mediated recombination in the epiblast by crossing the Crkl-flox mice  
535 (Crkl<sup>tm1c(EUCOMM)Hmgu/ImoJ</sup>) (70) with Meox2 Cre knock-in strain (71), followed by backcrosses  
536 with wild-type C57BL/6 mice to segregate out Meox2Cre. Tbx1<sup>lacZ/+</sup> (72) mice were obtained  
537 from Prof. Antonio Baldini via Prof. Peter Scambler at University College London. Tbx1 and  
538 Crkl compound heterozygous mice (Tbx1<sup>+/-</sup>Crkl<sup>+/-</sup>) were generated by crossing between Tbx1<sup>+/-</sup>  
539 males with Crkl<sup>+/-</sup> females. Embryos of specific embryonic ages were obtained through timed  
540 mating where the presence of vaginal plug was defined as embryonic day (E)0.5.

541

### 542 **Isolation of mouse thymic stromal cells and preparation for flow cytometry**

543

544 Thymic cell suspensions were obtained via enzymatic digestion of thymic lobes using Liberase  
545 (Roche) and DNaseI (Roche). To enrich for non-haematopoietic stromal cells in thymic digests  
546 from adult mice, cell suspensions were counted and stained with anti-CD45 microbeads (Miltenyi  
547 Biotec) for 15 min on ice, before negative selection using the AutoMACS (Miltenyi Biotec)  
548 system. Enriched samples or non-enriched samples were then stained for cell surface markers for  
549 30 min at 4°C. For intracellular staining, the Foxp3 Transcription Factor Staining Buffer Kit  
550 (eBioscience) was used according to the manufacturer's instructions. Combinations of UEA-1  
551 lectin (Vector Laboratories) labelled with BV605 and the following antibodies were used to stain  
552 the cells: TER-119::BV421 (BioLegend), CD45::AF700 (30-F11, BioLegend),  
553 EpCAM::PerCPy5.5 (G8.8, BioLegend), Ly51::PE (6C3, BioLegend), CD80::PECy5 (16-10A1,  
554 BioLegend), CD26::PECy7 (H194-112, BioLegend), MHCII::APCCy7 (M5/114.15.2,  
555 BioLegend), MHCII::BV421 (M5/114.15.2, BioLegend), CD31::AF488 (MEC13.3, BioLegend),  
556 podoplanin (gp38)::AF647(PMab-1, BioLegend). DAPI or the LIVE/DEAD Fixable Aqua Dead  
557 Cell Stain Kit was used (Thermo Fisher Scientific) for the assessment of cell viability. After  
558 staining, cells were acquired and sorted using a FACS Aria III (BD Biosciences) and analysed  
559 using FlowJo v10 and GraphPad Prism 8. Statistical analyses were performed using t-tests, with  
560 correction for multiple comparisons where appropriate. A p-value or the adjusted P-value of ≤  
561 0.05 was considered statistically significant.

562

### 563 **Immunofluorescent microscopy for extracellular matrix proteins**

564

565 Thymus from a 5-weeks-old female WT C57BL/6J mouse was used. The standard procedure for  
566 immunofluorescence on tissue sections was described here  
567 (<https://www.biorxiv.org/content/10.1101/2021.03.21.436320v1>). Briefly, organs are collected in  
568 PBS, fixed in 4% paraformaldehyde overnight at 4°C on a rotating shaker. Organs were then  
569 washed in PBS, and lobes separated for the next steps. Paraffin infiltration was done using a  
570 Tissue-Tek VIP 6 AI Vacuum Infiltration Processor (Sakura). Lobes were then embedded in  
571 paraffin and 4µm sections cut with a Hyrax M25 microtome (Zeiss).  
572 Before immunostaining, de-waxing and antigen retrieval in citrate buffer at pH6.0 (using a heat-  
573 induced epitope retrieval PT module, ThermoFischer Scientific) were performed. Sections were  
574 then blocked and permeabilized for 30min in 1% BSA, 0.2% Triton X-100 in PBS and blocked  
575 for 30min in 10% donkey serum (Gibco) in PBS at RT. Sections were incubated with primary

576 antibodies overnight at 4°C in 1.5% donkey serum in PBS. Sections were washed twice in 1%  
577 BSA, 0.2% Triton X-100 in PBS and incubated with secondary antibodies at RT for 45min.  
578 Finally, sections were washed twice in 0.2% Triton X-100 in PBS and mounted with  
579 Fluoromount-G (SouthernBiotech). Pictures were acquired with a CCD DFC 3000 black and  
580 white camera on an upright Leica DM5500 scanning microscope.  
581 Antibodies: goat anti-Fibronectin (Santa Cruz, sc-6953, 1/250); rabbit anti-Collagen 1 (Abcam,  
582 ab21286, 1/250); Donkey anti-goat Alexa 488 (ThermoFischer Scientific, A-11055, 1/500);  
583 Donkey anti-rabbit Alexa 647 (ThermoFischer Scientific, A-31573, 1/500). Nuclei staining: DAPI  
584 (Sigma-Aldrich, 1µg per ml).  
585

## 586 Immunofluorescent microscopy for CD26 and podoplanin

587  
588 Freshly isolated thymic lobes were frozen in OCT compound (Tissue-Tek) and cryosectioned at a  
589 thickness of 10 µm. Tissue sections were fixed with ice cold acetone for 5 min and blocked with  
590 Avidin/Biotin Blocking Kit (Vector laboratories) and Protein block (Protein block (Dako)  
591 according to manufacturer's protocol. Tissue sections were then incubated with primary  
592 antibodies at 4 °C overnight: rabbit anti-mouse CD26 (DPP4) (EPR5883(2), Abcam) and biotin  
593 anti-mouse podoplanin (8.1.1, Biolegend). Secondary antibody staining was performed at room  
594 temperature for 30 min with anti-rabbit:AF488 (Invitrogen) and streptavidin-AF555 (Invitrogen)).  
595 Nuclei were stained with Hoechst 34580 in PBS (according to manufacturer's protocol). Sections  
596 were mounted with ProLong Gold Antifade Mountant (Thermo Fisher Scientific) and acquired  
597 using an LSM700 confocal microscope (Carl Zeiss AG). Image analysis was performed with  
598 ImageJ software (Rasband WS, ImageJ, US National Institutes of Health, Bethesda, Md).  
599

## 600 Single cell RNA sequencing

601  
602 Total thymic non-epithelial stromal cells (Live Ter119-CD45-EpCAM-) thymic cells from E12.5,  
603 E13.5, E16.5, P0 and 4-week-old wild type mice were sorted and kept on ice before they were  
604 counted. 18,000 cells per sample were loaded onto a Chromium Single Cell B Chip (10x  
605 Genomics) followed by library preparation using Chromium Single Cell 3' solution (10x  
606 Genomics) and sequencing by NovaSeq6000. (28+98) (Illumina). For the  $Tbx1^{LacZ/+}Crkl^{+/-}$   
607 dataset, total non-haematopoietic stromal cells (Live Ter119-CD45-) from P0  $Tbx1^{LacZ/+}Crkl^{+/-}$   
608 (n=3) and their wildtype littermates (n=3) were sorted and fixed using RNAprotect Cell Reagent  
609 (Qiagen) for storage before sample submission to the Oxford Genomics Centre, where all  
610 downstream steps were performed including 10x Genomics Chip loading, library preparation and  
611 sequencing.  
612

## 613 Single cell RNA sequencing analysis

614  
615 Sequencing reads were processed using Cell Ranger (version 3.1.0). Cells were retained for  
616 downstream analysis if there was expression of >1,000 genes, <5% of UMIs mapped to  
617 mitochondrial genes, cells were called as singlets by DoubletFinder, and cells did not cluster into  
618 *Ptpnc* (CD45)-expressing clusters or other contaminant clusters (such as thymic epithelial cells or  
619 clusters present only in one replicate) (73). Seurat was used to remove batch effect between  
620 samples using canonical correlation analysis-based integration (74). Cells were projected into  
621 two-dimensional space using Uniform Manifold Approximation and Projection (UMAP). Clusters  
622 were called using a resolution of 0.8 and cell label transfer between datasets was undertaken using  
623 Seurat. Differential analysis between clusters used Wilcoxon-rank sum testing and over different  
624 ages used the Kruskal-Wallis analysis of variance. P-values were corrected for multiple  
625 hypothesis testing using the Benjamini-Hochberg method. GENIE3 and RcisTarget were used to

626 identify gene-regulatory networks on highly variable genes expressed in at least 5% of cells with  
627 subsequent module expression calculated using Seurat (75). RNA velocity analysis was  
628 undertaken using Velocyto and scVelo (76, 77). Ligand-receptor-target networks were inferred  
629 using Nichenetr, with differential expression assessed between early (E12.5/13.5) and late (E16.5)  
630 embryogenesis (38). Gene ontology analysis was undertaken using clusterProfiler (version 4.0.0)  
631 (78).

632

### 633 **Single nuclei multiomics of human fetal thymic stroma**

634

635 Human fetal thymi, obtained from terminations of pregnancy at 14 and 17 post conception weeks  
636 were enzymatically dissociated using Liberase (Roche) and DNaseI (Roche). The resultant cell  
637 suspension was stained with the following antibodies directed against cell surface antigens for 30  
638 minutes at 4°C: CD45::BV421 (H130, BioLegend) and HLA-DR::PE-Cy7 (L243, BioLegend);  
639 7AAD (BioLegend) was used as a viability marker. Live CD45- MHCII intermediate-high cells  
640 were sorted in 250, 000 cell aliquots using a FACS Aria III (BD Biosciences). Samples were then  
641 processed using the 10x Genomics Multiomics ATAC (Assay for Transposase-Accessible  
642 Chromatin using sequencing) + Gene Expression kit according to the manufacturer's protocol  
643 with some adaptations. Specifically, nuclei were isolated using a 0.1x diluted nuclei extraction  
644 buffer for 6 minutes before being captured into droplets on the 10x Genomics Chromium platform  
645 and sequenced on an Illumina NovaSeq machine.

646 This study of human thymic tissue has been granted ethical approval and is publicly listed (IRAS  
647 ID 156910, CPMS ID 19587).

648

### 649 **Multiomics analysis**

650

651 Sequencing data were processed using Cell Ranger ARC (version 1.0.1). Counts and ATAC data  
652 were analysed using Seurat (version 4.0.3) and Signac (version 1.2.1) (74, 79). Barcodes were  
653 filtered to high quality cells (ATAC library size 1,000-100,000, RNA library size 1,000-31,622,  
654 ATAC peaks 1,000-31,622, RNA features 1,000-10,000 and proportion of mitochondrial RNA  
655 reads  $\leq 0.15$ ). ATAC peaks were recalled across each sample for all cells. Clusters were called on  
656 integrated RNA data used a clustering threshold of 0.8 and projected onto a joint UMAP plot of  
657 RNA and ATAC components generated using Seurat and Signac. Differential gene expression  
658 between clusters was estimated using the default method in Seurat. Differentially accessible peaks  
659 were identified using the likelihood ratio method with correction for ATAC library size. Motif  
660 activity was estimated using chromVAR with the JASPAR2020 motif dataset (80). RNA-ATAC  
661 links were analysed using Signac and Seurat in 50kb windows around genes of interest.

662

663



## References

1. G. Anderson, E. J. Jenkinson, N. C. Moore, J. J. Owen, MHC class II-positive epithelium and mesenchyme cells are both required for T-cell development in the thymus. *Nature* **362**, 70-73 (1993).
2. K. D. James, E. J. Cosway, B. Lucas, A. J. White, S. M. Parnell, M. Carvalho-Gaspar, A. V. Tumanov, G. Anderson, W. E. Jenkinson, Endothelial cells act as gatekeepers for LT $\beta$ R-dependent thymocyte emigration. *Journal of Experimental Medicine* **215**, 2984-2993 (2018).
3. K. M. Sitnik, K. Kotarsky, A. J. White, W. E. Jenkinson, G. Anderson, W. W. Agace, Mesenchymal cells regulate retinoic acid receptor-dependent cortical thymic epithelial cell homeostasis. *J Immunol* **188**, 4801-4809 (2012).
4. K. M. Sitnik, K. Wendland, H. Weishaupt, H. Uronen-Hansson, A. J. White, G. Anderson, K. Kotarsky, W. W. Agace, Context-Dependent Development of Lymphoid Stroma from Adult CD34(+) Adventitial Progenitors. *Cell Rep* **14**, 2375-2388 (2016).
5. J. Baran-Gale, M. D. Morgan, S. Maio, F. Dhalla, I. Calvo-Asensio, M. E. Deadman, A. E. Handel, A. Maynard, S. Chen, F. Green, R. V. Sit, N. F. Neff, S. Darmanis, W. Tan, A. P. May, J. C. Marioni, C. P. Ponting, G. A. Holländer, Ageing compromises mouse thymus function and remodels epithelial cell differentiation. *Elife* **9**, (2020).
6. C. Bornstein, S. Nevo, A. Giladi, N. Kadouri, M. Pouzolles, F. Gerbe, E. David, A. Machado, A. Chuprin, B. Tóth, O. Goldberg, S. Itzkovitz, N. Taylor, P. Jay, V. S. Zimmermann, J. Abramson, I. Amit, Single-cell mapping of the thymic stroma identifies IL-25-producing tuft epithelial cells. *Nature* **559**, 622-626 (2018).
7. W. E. Jenkinson, E. J. Jenkinson, G. Anderson, Differential requirement for mesenchyme in the proliferation and maturation of thymic epithelial progenitors. *J Exp Med* **198**, 325-332 (2003).
8. T. Nitta, H. Takayanagi, Non-Epithelial Thymic Stromal Cells: Unsung Heroes in Thymus Organogenesis and T Cell Development. *Front Immunol* **11**, 620894 (2020).
9. M. B. Buechler, R. N. Pradhan, A. T. Krishnamurthy, C. Cox, A. K. Calviello, A. W. Wang, Y. A. Yang, L. Tam, R. Caothien, M. Roose-Girma, Z. Modrusan, J. R. Arron, R. Bourgon, S. Müller, S. J. Turley, Cross-tissue organization of the fibroblast lineage. *Nature* **593**, 575-579 (2021).
10. J. Kalucka, L. P. M. H. de Rooij, J. Goveia, K. Rohlenova, S. J. Dumas, E. Meta, N. V. Concinha, F. Taverna, L.-A. Teuwen, K. Veys, M. García-Caballero, S. Khan, V. Geldhof, L. Sokol, R. Chen, L. Treppe, M. Borri, P. de Zeeuw, C. Dubois, T. K. Karakach, K. D. Falkenberg, M. Parys, X. Yin, S. Vinckier, Y. Du, R. A. Fenton, L. Schoonjans, M. Dewerchin, G. Eelen, B. Thienpont, L. Lin, L. Bolund, X. Li, Y. Luo, P. Carmeliet, Single-Cell Transcriptome Atlas of Murine Endothelial Cells. *Cell* **180**, 764-779.e720 (2020).
11. S. Rafii, J. M. Butler, B. S. Ding, Angiocrine functions of organ-specific endothelial cells. *Nature* **529**, 316-325 (2016).
12. S. M. Müller, C. C. Stolt, G. Terszowski, C. Blum, T. Amagai, N. Kessaris, P. Iannarelli, W. D. Richardson, M. Wegner, H. R. Rodewald, Neural crest origin of perivascular mesenchyme in the adult thymus. *J Immunol* **180**, 5344-5351 (2008).
13. T. Nitta, M. Tsutsumi, S. Nitta, R. Muro, E. C. Suzuki, K. Nakano, Y. Tomofuji, S. Sawa, T. Okamura, J. M. Penninger, H. Takayanagi, Fibroblasts as a source of self-antigens for central immune tolerance. *Nat Immunol* **21**, 1172-1180 (2020).
14. T. Xie, Y. Wang, N. Deng, G. Huang, F. Taghavifar, Y. Geng, N. Liu, V. Kulur, C. Yao, P. Chen, Z. Liu, B. Stripp, J. Tang, J. Liang, P. W. Noble, D. Jiang, Single-Cell

- 713 Deconvolution of Fibroblast Heterogeneity in Mouse Pulmonary Fibrosis. *Cell Rep* **22**,  
714 3625-3640 (2018).
- 715 15. N. Morooka, S. Futaki, R. Sato-Nishiuchi, M. Nishino, Y. Totani, C. Shimono, I. Nakano,  
716 H. Nakajima, N. Mochizuki, K. Sekiguchi, Polydom Is an Extracellular Matrix Protein  
717 Involved in Lymphatic Vessel Remodeling. *Circ. Res.* **120**, 1276-1288 (2017).
- 718 16. A. Clemenceau, C. Diorio, F. Durocher, Role of Secreted Frizzled-Related Protein 1 in  
719 Early Mammary Gland Tumorigenesis and Its Regulation in Breast Microenvironment.  
720 *Cells* **9**, 208 (2020).
- 721 17. P. A. Eisenach, E. Soeth, C. Röder, G. Klöppel, J. Tepel, H. Kalthoff, B. Sipos,  
722 Dipeptidase 1 (DPEP1) is a marker for the transition from low-grade to high-grade  
723 intraepithelial neoplasia and an adverse prognostic factor in colorectal cancer. *Br J Cancer*  
724 **109**, 694-703 (2013).
- 725 18. M. Vaittinen, M. Kolehmainen, U. Schwab, M. Uusitupa, L. Pulkkinen, Microfibrillar-  
726 associated protein 5 is linked with markers of obesity-related extracellular matrix  
727 remodeling and inflammation. *Nutrition & Diabetes* **1**, e15-e15 (2011).
- 728 19. J. M. Ngu, G. Teng, H. C. Meijndert, H. E. Mewhort, J. D. Turnbull, W. G. Stetler-  
729 Stevenson, P. W. Fedak, Human cardiac fibroblast extracellular matrix remodeling: dual  
730 effects of tissue inhibitor of metalloproteinase-2. *Cardiovasc Pathol* **23**, 335-343 (2014).
- 731 20. R. Du, B. Liu, L. Zhou, D. Wang, X. He, X. Xu, L. Zhang, C. Niu, S. Liu,  
732 Downregulation of annexin A3 inhibits tumor metastasis and decreases drug resistance in  
733 breast cancer. *Cell Death Dis* **9**, 126 (2018).
- 734 21. S. Yakar, M. L. Adamo, Insulin-like growth factor 1 physiology: lessons from mouse  
735 models. *Endocrinol Metab Clin North Am* **41**, 231-247, v (2012).
- 736 22. T. Zhou, L. Yu, J. Huang, X. Zhao, Y. Li, Y. Hu, Y. Lei, GDF10 inhibits proliferation and  
737 epithelial-mesenchymal transition in triple-negative breast cancer via upregulation of  
738 Smad7. *Aging (Albany NY)* **11**, 3298-3314 (2019).
- 739 23. S. Zhao, J. Zhang, X. Hou, L. Zan, N. Wang, Z. Tang, K. Li, OLFML3 expression is  
740 decreased during prenatal muscle development and regulated by microRNA-155 in pigs.  
741 *Int J Biol Sci* **8**, 459-469 (2012).
- 742 24. E. Germanov, L. Veinotte, R. Cullen, E. Chamberlain, E. C. Butcher, B. Johnston, Critical  
743 role for the chemokine receptor CXCR6 in homeostasis and activation of CD1d-restricted  
744 NKT cells. *J Immunol* **181**, 81-91 (2008).
- 745 25. M. Kurokawa, S. Matsukura, M. Kawaguchi, K. Ieki, S. Suzuki, S. Watanabe, T. Homma,  
746 M. Yamaguchi, H. Takeuchi, M. Adachi, Interleukin-33-activated dendritic cells induce  
747 the production of thymus and activation-regulated chemokine and macrophage-derived  
748 chemokine. *Int Arch Allergy Immunol* **161 Suppl 2**, 52-57 (2013).
- 749 26. C. Bondjers, L. He, M. Takemoto, J. Norlin, N. Asker, M. Hellström, P. Lindahl, C.  
750 Betsholtz, Microarray analysis of blood microvessels from PDGF-B and PDGF-Rbeta  
751 mutant mice identifies novel markers for brain pericytes. *Faseb j* **20**, 1703-1705 (2006).
- 752 27. E. M. Southard-Smith, L. Kos, W. J. Pavan, Sox10 mutation disrupts neural crest  
753 development in Dom Hirschsprung mouse model. *Nat Genet* **18**, 60-64 (1998).
- 754 28. L. Teng, N. A. Mundell, A. Y. Frist, Q. Wang, P. A. Labosky, Requirement for Foxd3 in  
755 the maintenance of neural crest progenitors. *Development* **135**, 1615-1624 (2008).
- 756 29. H. R. Rodewald, Thymus organogenesis. *Annu Rev Immunol* **26**, 355-388 (2008).
- 757 30. D. B. Klug, C. Carter, I. B. Gimenez-Conti, E. R. Richie, Cutting edge: thymocyte-  
758 independent and thymocyte-dependent phases of epithelial patterning in the fetal thymus.  
759 *J Immunol* **169**, 2842-2845 (2002).
- 760 31. K. Foster, J. Sheridan, H. Veiga-Fernandes, K. Roderick, V. Pachnis, R. Adams, C.  
761 Blackburn, D. Kioussis, M. Coles, Contribution of neural crest-derived cells in the  
762 embryonic and adult thymus. *J Immunol* **180**, 3183-3189 (2008).

- 763 32. R. Dixit, X. Ai, A. Fine, Derivation of lung mesenchymal lineages from the fetal  
764 mesothelium requires hedgehog signaling for mesothelial cell entry. *Development* **140**,  
765 4398-4406 (2013).
- 766 33. S. Aibar, C. B. González-Blas, T. Moerman, V. A. Huynh-Thu, H. Imrichova, G.  
767 Hulselmans, F. Rambow, J.-C. Marine, P. Geurts, J. Aerts, J. van den Oord, Z. K. Atak, J.  
768 Wouters, S. Aerts, SCENIC: single-cell regulatory network inference and clustering.  
769 *Nature Methods*, (2017).
- 770 34. M. Noizet, E. Lagoutte, M. Gratigny, M. Bouschbacher, I. Lazareth, H. Roest Crolius, X.  
771 Darzacq, C. Dugast-Darzacq, Master regulators in primary skin fibroblast fate  
772 reprogramming in a human ex vivo model of chronic wounds. *Wound Repair Regen* **24**,  
773 247-262 (2016).
- 774 35. N. M. Thalji, M. A. Hagler, H. Zhang, G. Casacang-Verzosa, A. A. Nair, R. M. Suri, J. D.  
775 Miller, Nonbiased Molecular Screening Identifies Novel Molecular Regulators of  
776 Fibrogenic and Proliferative Signaling in Myxomatous Mitral Valve Disease. *Circ*  
777 *Cardiovasc Genet* **8**, 516-528 (2015).
- 778 36. J. Qing, C. Liu, L. Choy, R. Y. Wu, J. S. Pagano, R. Derynck, Transforming growth factor  
779 beta/Smad3 signaling regulates IRF-7 function and transcriptional activation of the beta  
780 interferon promoter. *Mol Cell Biol* **24**, 1411-1425 (2004).
- 781 37. J. L. Bautista, N. T. Cramer, C. N. Miller, J. Chavez, D. I. Berrios, L. E. Byrnes, J.  
782 Germino, V. Ntranos, J. B. Sneddon, T. D. Burt, J. M. Gardner, C. J. Ye, M. S. Anderson,  
783 A. V. Parent, Single-cell transcriptional profiling of human thymic stroma uncovers novel  
784 cellular heterogeneity in the thymic medulla. *Nature Communications* **12**, 1096 (2021).
- 785 38. R. Browaeys, W. Saelens, Y. Saeys, NicheNet: modeling intercellular communication by  
786 linking ligands to target genes. *Nat Methods* **17**, 159-162 (2020).
- 787 39. D. M. McDonald-McGinn, K. E. Sullivan, B. Marino, N. Philip, A. Swillen, J. A.  
788 Vorstman, E. H. Zackai, B. S. Emanuel, J. R. Vermeesch, B. E. Morrow, P. J. Scambler,  
789 A. S. Bassett, 22q11.2 deletion syndrome. *Nat Rev Dis Primers* **1**, 15071 (2015).
- 790 40. A. Puech, B. Saint-Jore, B. Funke, D. J. Gilbert, H. Sirotkin, N. G. Copeland, N. A.  
791 Jenkins, R. Kucherlapati, B. Morrow, A. I. Skoultschi, Comparative mapping of the human  
792 22q11 chromosomal region and the orthologous region in mice reveals complex changes  
793 in gene organization. *Proc Natl Acad Sci U S A* **94**, 14608-14613 (1997).
- 794 41. D. L. Guris, G. Duester, V. E. Papaioannou, A. Imamoto, Dose-dependent interaction of  
795 Tbx1 and Crkl and locally aberrant RA signaling in a model of del22q11 syndrome. *Dev*  
796 *Cell* **10**, 81-92 (2006).
- 797 42. K. Lima, T. G. Abrahamsen, I. Foelling, S. Natvig, L. P. Ryder, R. W. Olausson, Low  
798 thymic output in the 22q11.2 deletion syndrome measured by CCR9+CD45RA+ T cell  
799 counts and T cell receptor rearrangement excision circles. *Clin Exp Immunol* **161**, 98-107  
800 (2010).
- 801 43. R. Thomas, W. Wang, D. M. Su, Contributions of Age-Related Thymic Involution to  
802 Immunosenescence and Inflammaging. *Immun Ageing* **17**, 2 (2020).
- 803 44. B. A. Benayoun, E. A. Pollina, P. P. Singh, S. Mahmoudi, I. Harel, K. M. Casey, B. W.  
804 Dulken, A. Kundaje, A. Brunet, Remodeling of epigenome and transcriptome landscapes  
805 with aging in mice reveals widespread induction of inflammatory responses. *Genome Res*  
806 **29**, 697-709 (2019).
- 807 45. J. W. Kasik, Y. J. Wan, K. Ozato, A burst of c-fos gene expression in the mouse occurs at  
808 birth. *Mol Cell Biol* **7**, 3349-3352 (1987).
- 809 46. L. Kochilas, S. Merscher-Gomez, M. M. Lu, V. Potluri, J. Liao, R. Kucherlapati, B.  
810 Morrow, J. A. Epstein, The role of neural crest during cardiac development in a mouse  
811 model of DiGeorge syndrome. *Dev Biol* **251**, 157-166 (2002).

- 812 47. E. Theveneau, R. Mayor, Neural crest delamination and migration: From epithelium-to-  
813 mesenchyme transition to collective cell migration. *Dev. Biol.* **366**, 34-54 (2012).
- 814 48. T. Werner, A. Hammer, M. Wahlbuhl, M. R. Bösl, M. Wegner, Multiple conserved  
815 regulatory elements with overlapping functions determine Sox10 expression in mouse  
816 embryogenesis. *Nucleic Acids Res* **35**, 6526-6538 (2007).
- 817 49. R. M. Williams, I. Candido-Ferreira, E. Repapi, D. Gavriouchkina, U. Senanayake, I. T.  
818 C. Ling, J. Telenius, S. Taylor, J. Hughes, T. Sauka-Spengler, Reconstruction of the  
819 Global Neural Crest Gene Regulatory Network In Vivo. *Developmental Cell* **51**, 255-  
820 276.e257 (2019).
- 821 50. M. V. Plikus, X. Wang, S. Sinha, E. Forte, S. M. Thompson, E. L. Herzog, R. R. Driskell,  
822 N. Rosenthal, J. Biernaskie, V. Horsley, Fibroblasts: Origins, definitions, and functions in  
823 health and disease. *Cell* **184**, 3852-3872 (2021).
- 824 51. M. D. Lynch, F. M. Watt, Fibroblast heterogeneity: implications for human disease. *J Clin*  
825 *Invest* **128**, 26-35 (2018).
- 826 52. J. E. Park, R. A. Botting, C. Dominguez Conde, D. M. Popescu, M. Lavaert, D. J. Kunz, I.  
827 Goh, E. Stephenson, R. Ragazzini, E. Tuck, A. Wilbrey-Clark, K. Roberts, V. R. Kedlian,  
828 J. R. Ferdinand, X. He, S. Webb, D. Maunder, N. Vandamme, K. T. Mahbubani, K.  
829 Polanski, L. Mamanova, L. Bolt, D. Crossland, F. de Rita, A. Fuller, A. Filby, G.  
830 Reynolds, D. Dixon, K. Saeb-Parsy, S. Lisgo, D. Henderson, R. Vento-Tormo, O. A.  
831 Bayraktar, R. A. Barker, K. B. Meyer, Y. Saeys, P. Bonfanti, S. Behjati, M. R.  
832 Clatworthy, T. Taghon, M. Haniffa, S. A. Teichmann, A cell atlas of human thymic  
833 development defines T cell repertoire formation. *Science* **367**, (2020).
- 834 53. C. Liu, F. Saito, Z. Liu, Y. Lei, S. Uehara, P. Love, M. Lipp, S. Kondo, N. Manley, Y.  
835 Takahama, Coordination between CCR7- and CCR9-mediated chemokine signals in  
836 prevascular fetal thymus colonization. *Blood* **108**, 2531-2539 (2006).
- 837 54. M. L. Scimone, I. Aifantis, I. Apostolou, H. von Boehmer, U. H. von Andrian, A multistep  
838 adhesion cascade for lymphoid progenitor cell homing to the thymus. *PNAS* **103**, 7006-  
839 7011 (2006).
- 840 55. D. L. Foss, E. Donskoy, I. Goldschneider, The Importation of Hematogenous Precursors  
841 by the Thymus Is a Gated Phenomenon in Normal Adult Mice. *Journal of Experimental*  
842 *Medicine* **193**, 365-374 (2001).
- 843 56. Y. Maeda, H. Yagi, K. Takemoto, H. Utsumi, A. Fukunari, K. Sugahara, T. Masuko, K.  
844 Chiba, S1P lyase in thymic perivascular spaces promotes egress of mature thymocytes via  
845 up-regulation of S1P receptor 1. *Int. Immunol.* **26**, 245-255 (2013).
- 846 57. B. Bréart, W. D. Ramos-Perez, A. Mendoza, A. K. Salous, M. Gobert, Y. Huang, R. H.  
847 Adams, J. J. Lafaille, D. Escalante-Alcalde, A. J. Morris, S. R. Schwab, Lipid phosphate  
848 phosphatase 3 enables efficient thymic egress. *Journal of Experimental Medicine* **208**,  
849 1267-1278 (2011).
- 850 58. S. Fukuhara, S. Simmons, S. Kawamura, A. Inoue, Y. Orba, T. Tokudome, Y. Sunden, Y.  
851 Arai, K. Moriwaki, J. Ishida, A. Uemura, H. Kiyonari, T. Abe, A. Fukamizu, M.  
852 Hirashima, H. Sawa, J. Aoki, M. Ishii, N. Mochizuki, The sphingosine-1-phosphate  
853 transporter Spns2 expressed on endothelial cells regulates lymphocyte trafficking in mice.  
854 *J Clin Invest* **122**, 1416-1426 (2012).
- 855 59. M. Matloubian, C. G. Lo, G. Cinamon, M. J. Lesneski, Y. Xu, V. Brinkmann, M. L.  
856 Allende, R. L. Proia, J. G. Cyster, Lymphocyte egress from thymus and peripheral  
857 lymphoid organs is dependent on S1P receptor 1. *Nature* **427**, 355-360 (2004).
- 858 60. W. E. Jenkinson, S. W. Rossi, S. M. Parnell, E. J. Jenkinson, G. Anderson, PDGFRalpha-  
859 expressing mesenchyme regulates thymus growth and the availability of intrathymic  
860 niches. *Blood* **109**, 954-960 (2007).

- 861 61. P. T. Tsai, R. A. Lee, H. Wu, BMP4 acts upstream of FGF in modulating thymic stroma  
862 and regulating thymopoiesis. *Blood* **102**, 3947-3953 (2003).
- 863 62. G. Balciunaite, M. P. Keller, E. Balciunaite, L. Piali, S. Zuklys, Y. D. Mathieu, J. Gill, R.  
864 Boyd, D. J. Sussman, G. A. Holländer, Wnt glycoproteins regulate the expression of  
865 FoxN1, the gene defective in nude mice. *Nat Immunol* **3**, 1102-1108 (2002).
- 866 63. S. Žuklys, A. Handel, S. Zhanybekova, F. Govani, M. Keller, S. Maio, C. E. Mayer, H. Y.  
867 Teh, K. Hafen, G. Gallone, T. Barthlott, C. P. Ponting, G. A. Holländer, Foxn1 regulates  
868 key target genes essential for T cell development in postnatal thymic epithelial cells.  
869 *Nature Immunology* **17**, 1206-1215 (2016).
- 870 64. F. Brunk, I. Augustin, M. Meister, M. Boutros, B. Kyewski, Thymic Epithelial Cells Are a  
871 Nonredundant Source of Wnt Ligands for Thymus Development. *J. Immunol.* **195**, 5261-  
872 5271 (2015).
- 873 65. M. Osada, E. Ito, H. A. Fermin, E. Vazquez-Cintron, T. Venkatesh, R. H. Friedel, M.  
874 Pezzano, The Wnt Signaling Antagonist Kremen1 is Required for Development of  
875 Thymic Architecture. *Clinical and Developmental Immunology* **13**, 602150 (2006).
- 876 66. M. Osada, L. Jardine, R. Misir, T. Andl, S. E. Millar, M. Pezzano, DKK1 Mediated  
877 Inhibition of Wnt Signaling in Postnatal Mice Leads to Loss of TEC Progenitors and  
878 Thymic Degeneration. *PLOS ONE* **5**, e9062 (2010).
- 879 67. L. Sun, C. Sun, Z. Liang, H. Li, L. Chen, H. Luo, H. Zhang, P. Ding, X. Sun, Z. Qin, Y.  
880 Zhao, FSP1(+) fibroblast subpopulation is essential for the maintenance and regeneration  
881 of medullary thymic epithelial cells. *Sci Rep* **5**, 14871 (2015).
- 882 68. J. F. George, Jr., H. W. Schroeder, Jr., Developmental regulation of D beta reading frame  
883 and junctional diversity in T cell receptor-beta transcripts from human thymus. *J Immunol*  
884 **148**, 1230-1239 (1992).
- 885 69. H. Wurdak, L. M. Ittner, K. S. Lang, P. Leveen, U. Suter, J. A. Fischer, S. Karlsson, W.  
886 Born, L. Sommer, Inactivation of TGFbeta signaling in neural crest stem cells leads to  
887 multiple defects reminiscent of DiGeorge syndrome. *Genes Dev* **19**, 530-535 (2005).
- 888 70. E. Lopez-Rivera, Y. P. Liu, M. Verbitsky, B. R. Anderson, V. P. Capone, E. A. Otto, Z.  
889 Yan, A. Mitrotti, J. Martino, N. J. Steers, D. A. Fasel, K. Vukojevic, R. Deng, S. E.  
890 Racedo, Q. Liu, M. Werth, R. Westland, A. Vivante, G. S. Makar, M. Bodria, M. G.  
891 Sampson, C. E. Gillies, V. Vega-Warner, M. Maiorana, D. S. Petrey, B. Honig, V. J.  
892 Lozanovski, R. Salomon, L. Heidet, W. Carpentier, D. Gaillard, A. Carrea, L. Gesualdo,  
893 D. Cusi, C. Izzi, F. Scolari, J. A. van Wijk, A. Arapovic, M. Saraga-Babic, M. Saraga, N.  
894 Kunac, A. Samii, D. M. McDonald-McGinn, T. B. Crowley, E. H. Zackai, D. Drozd, M.  
895 Miklaszewska, M. Tkaczyk, P. Sikora, M. Szczepanska, M. Mizerska-Wasiak, G.  
896 Krzemien, A. Szmigielska, M. Zaniew, J. M. Darlow, P. Puri, D. Barton, E. Casolari, S. L.  
897 Furth, B. A. Warady, Z. Gucev, H. Hakonarson, H. Flogelova, V. Tasic, A. Latos-  
898 Bielenska, A. Materna-Kirylyuk, L. Allegri, C. S. Wong, I. A. Drummond, V. D'Agati, A.  
899 Imamoto, J. M. Barasch, F. Hildebrandt, K. Kirylyuk, R. P. Lifton, B. E. Morrow, C.  
900 Jeanpierre, V. E. Papaioannou, G. M. Ghiggeri, A. G. Gharavi, N. Katsanis, S. Sanna-  
901 Cherchi, Genetic Drivers of Kidney Defects in the DiGeorge Syndrome. *N Engl J Med*  
902 **376**, 742-754 (2017).
- 903 71. M. D. Tallquist, P. Soriano, Epiblast-restricted Cre expression in MORE mice: a tool to  
904 distinguish embryonic vs. extra-embryonic gene function. *Genesis* **26**, 113-115 (2000).
- 905 72. E. A. Lindsay, F. Vitelli, H. Su, M. Morishima, T. Huynh, T. Pramparo, V. Jurecic, G.  
906 Ogunrinu, H. F. Sutherland, P. J. Scambler, A. Bradley, A. Baldini, Tbx1  
907 haploinsufficiency in the DiGeorge syndrome region causes aortic arch defects in mice.  
908 *Nature* **410**, 97-101 (2001).

- 909 73. C. S. McGinnis, L. M. Murrow, Z. J. Gartner, DoubletFinder: Doublet Detection in  
910 Single-Cell RNA Sequencing Data Using Artificial Nearest Neighbors. *Cell Syst* **8**, 329-  
911 337.e324 (2019).
- 912 74. T. Stuart, A. Butler, P. Hoffman, C. Hafemeister, E. Papalexi, W. M. Mauck, 3rd, Y. Hao,  
913 M. Stoeckius, P. Smibert, R. Satija, Comprehensive Integration of Single-Cell Data. *Cell*  
914 **177**, 1888-1902.e1821 (2019).
- 915 75. S. Aibar, C. B. González-Blas, T. Moerman, V. A. Huynh-Thu, H. Imrichova, G.  
916 Hulselmans, F. Rambow, J.-C. Marine, P. Geurts, J. Aerts, J. van den Oord, Z. K. Atak, J.  
917 Wouters, S. Aerts, SCENIC: single-cell regulatory network inference and clustering.  
918 *Nature Methods* **14**, 1083-1086 (2017).
- 919 76. V. Bergen, M. Lange, S. Peidli, F. A. Wolf, F. J. Theis, Generalizing RNA velocity to  
920 transient cell states through dynamical modeling. *Nature Biotechnology*, (2020).
- 921 77. G. La Manno, R. Soldatov, A. Zeisel, E. Braun, H. Hochgerner, V. Petukhov, K.  
922 Lidschreiber, M. E. Kastrioti, P. Lönnerberg, A. Furlan, J. Fan, L. E. Borm, Z. Liu, D. van  
923 Bruggen, J. Guo, X. He, R. Barker, E. Sundström, G. Castelo-Branco, P. Cramer, I.  
924 Adameyko, S. Linnarsson, P. V. Kharchenko, RNA velocity of single cells. *Nature* **560**,  
925 494-498 (2018).
- 926 78. T. Wu, E. Hu, S. Xu, M. Chen, P. Guo, Z. Dai, T. Feng, L. Zhou, W. Tang, L. Zhan, X.  
927 Fu, S. Liu, X. Bo, G. Yu, clusterProfiler 4.0: A universal enrichment tool for interpreting  
928 omics data. *The Innovation* **2**, 100141 (2021).
- 929 79. T. Stuart, A. Srivastava, C. Lareau, R. Satija, Multimodal single-cell chromatin analysis  
930 with Signac. *bioRxiv*, 2020.2011.2009.373613 (2020).
- 931 80. A. N. Schep, B. Wu, J. D. Buenrostro, W. J. Greenleaf, chromVAR: inferring  
932 transcription-factor-associated accessibility from single-cell epigenomic data. *Nature*  
933 *Methods* **14**, 975-978 (2017).  
934  
935

## Acknowledgments

### **Funding:**

Swiss National Science Foundation grant IZLJZ3\_171050; 310030\_184672 (GAH)

Medical Research Council grant MR/S036407/1 (GAH, AEH)

Wellcome Trust grant 105045/Z/14/Z (GAH)

The work was generously supported by a donor of Stanford's Center for Definitive and Curative Medicine 22q11 Deletion Syndrome Consortium (GAH)

National Institute for Health Research Oxford Biomedical Research Centre grant (GAH)

NIHR Clinical Lectureship (AEH, FD)

Health Research Bridging Salary Scheme (AEH)

Wellcome Trust grant (FD)

International postdoc fellowship from the Swedish research council (Vetenskapsrådet) (SC)

The human embryonic and fetal material was provided by the Joint MRC/Wellcome Trust (grant # MR/006237/1) Human Developmental Biology Resource ([www.hdbr.org](http://www.hdbr.org)).

### **Author contributions:**

Conceptualization: AEH, SC, ML, KW, GAH

Investigation: SC, FD, SM, TH, MED

Analysis: AEH, SC

Visualization: AEH, SC, FD, IR, TH, GAH

Supervision: ML, GAH

Writing—original draft: AEH, SC, GAH

Writing—review & editing: AEH, SC, FD, SM, TH, IR, MED, OE, ML, KW, GAH

**Competing interests:** Authors declare that they have no competing interests.

965 **Figures and Tables**  
966  
967



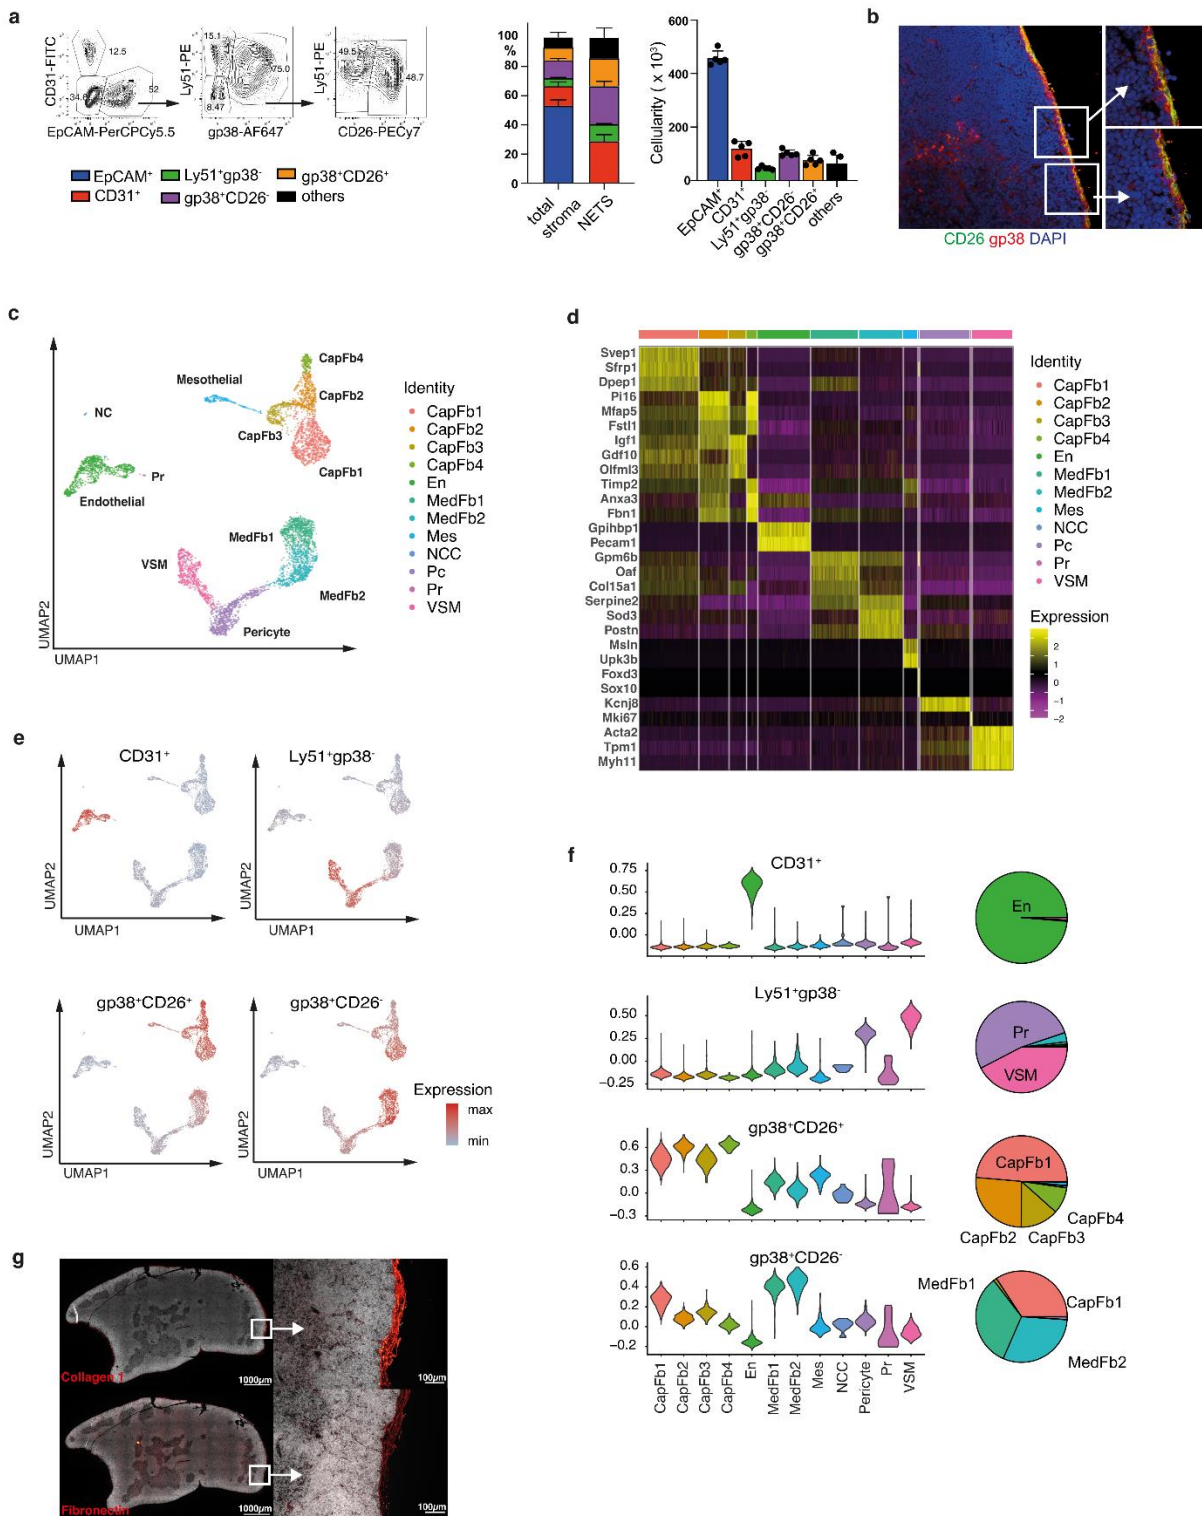

**Fig. 1 Heterogeneity of the thymic stroma at 4 weeks of age.** (a) Representative FACS plot of live Ter119<sup>-</sup> CD45<sup>-</sup> EpCAM<sup>-</sup> thymic stromal cells at 4 weeks old (left), the relative frequency (middle) and cellularity (right) of CD31<sup>+</sup>, Ly51+gp38<sup>+</sup>, CD26-gp38<sup>+</sup> and CD26+gp38<sup>+</sup> cells among total stroma or non-epithelial stroma. (b) Immunofluorescence staining of thymic mesenchymal cells (Red: gp38, Green: CD26, Blue: DAPI). (c) A UMAP plot of Ter119-CD45-EpCAM<sup>-</sup> cells from 4-week-old mice. (d) A heatmap of top 5 differentially expressed genes between each cluster. (e) An overlay on UMAP plot and (f) violin plots of the expression of genes specific to each FACS-isolated subpopulation from bulk RNA-seq and pie charts showing the

977 proportion of cell types which express gene signatures characteristic of specific FACS-isolated  
978 populations as inferred from bulk RNASeq. CapFb = capsular fibroblast; En = endothelium;  
979 MedFb = medullary fibroblast; Mes = mesothelium; NCC = neural crest; Pc = pericyte; Pr =  
980 proliferating cell; VSM = vascular smooth muscle. (g) Immunofluorescence microscopy showing  
981 the distribution of type-I and fibronectin in a 5-week-old mouse thymus. FACS data shown in  
982 panel a were representative of one experiment (n=5) out of two independent experiments (total  
983 n=7), and mean value and SD are shown in the corresponding bar graphs (n=5).  
984  
985

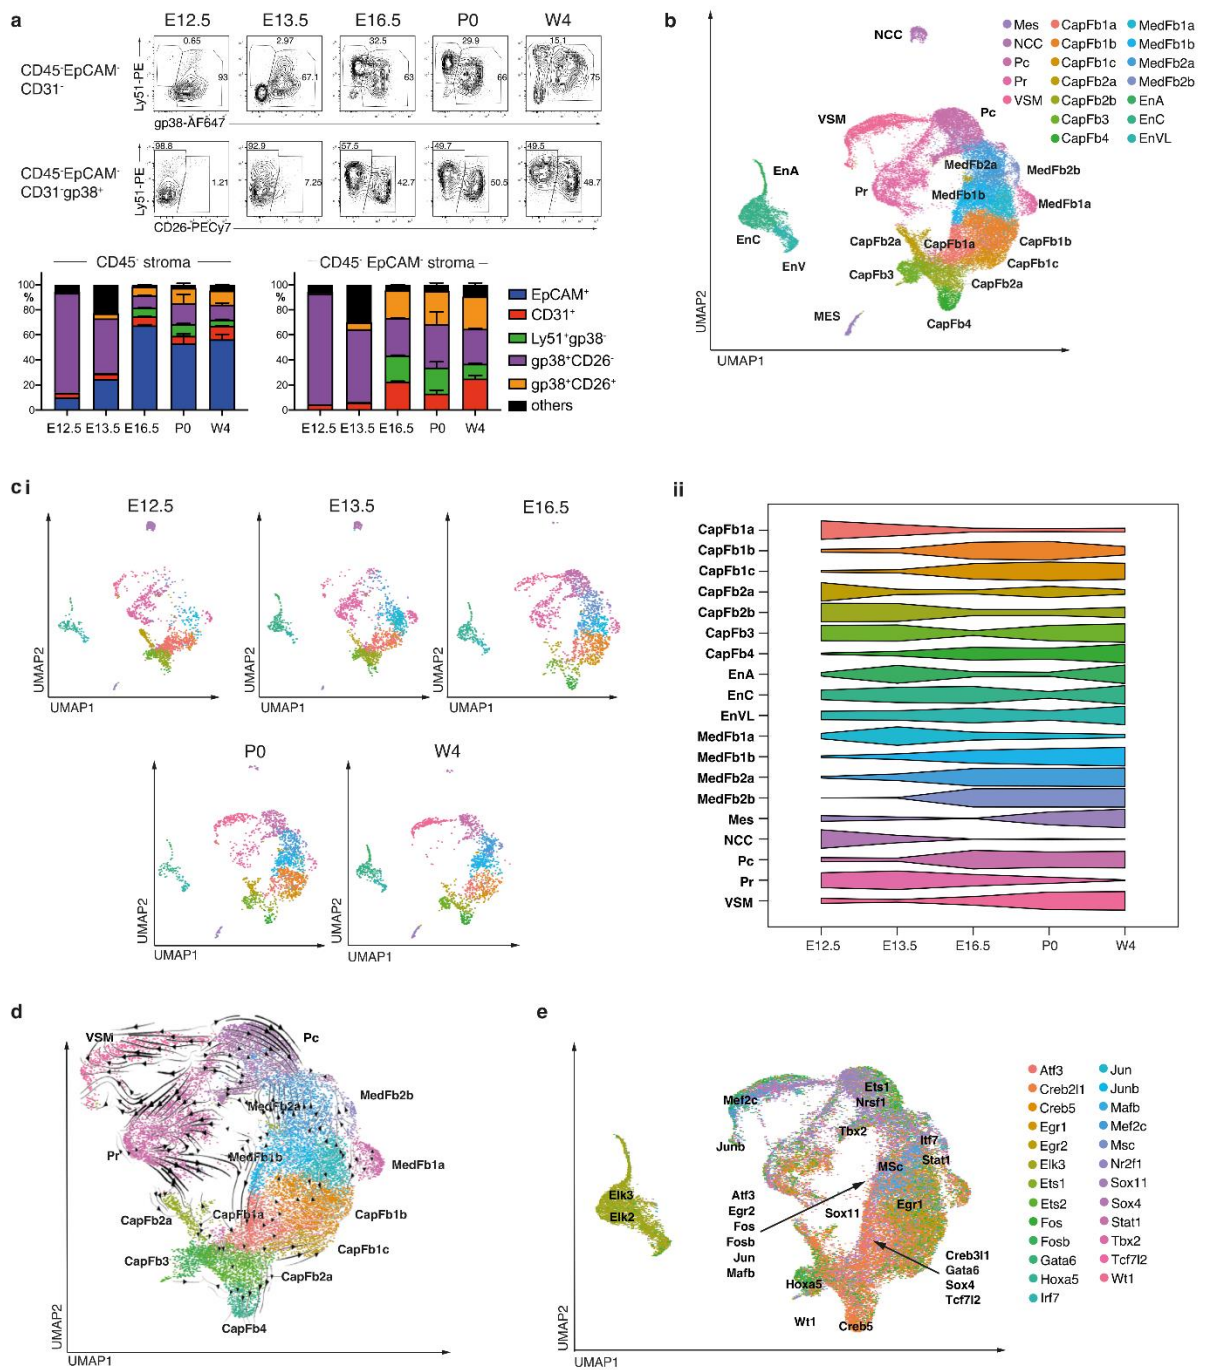

986  
987  
988  
989  
990  
991  
992  
993  
994  
995  
996  
997  
998

**Fig. 2 Characteristics of the thymic stroma over developmental time.** (a) (upper) representative FACS plot of the non-epithelial thymic stroma from E12.5 to week 4. (lower) and the relative frequency of stromal subpopulations among the total stroma (left) or the non-TEC stroma (right). (b) A combined UMAP plot of Ter119-CD45-EpCAM<sup>-</sup> cells from mice at E12.5, E13.5, E16.5, P0 and 4 weeks of age. (c) (i) Individual UMAP plots for each developmental timepoint, with cell number down-sampled to the smallest sample size (n = 1,997). (ii) Scaled proportional representation of each age in each cluster. (d) A UMAP plot with each cell coloured by the maximum transcription factor gene-regulatory network expression. Gene-regulatory network centroids are labelled. (e) An RNA velocity plot with velocity streamlines projected onto UMAP plot. CapFb = capsular fibroblast; EnA = arterial endothelium; ENCC = capillary endothelium; EnVL = venous/lymphatic endothelium; MedFb = medullary fibroblast; Mes = mesothelium; NCC = neural crest; Pc = pericyte; Pr = proliferating cell; VSM = vascular smooth

999 muscle. E12.5 and E13.5 were sorted and analysed from thymi pooled from two litters consist of  
1000 at least 3 embryos per litters. For E16.5, P0 and week 4, data shown consist of cells sorted from  
1001 two thymi per timepoint. Mean value and SD were shown in the bar charts (a).  
1002  
1003

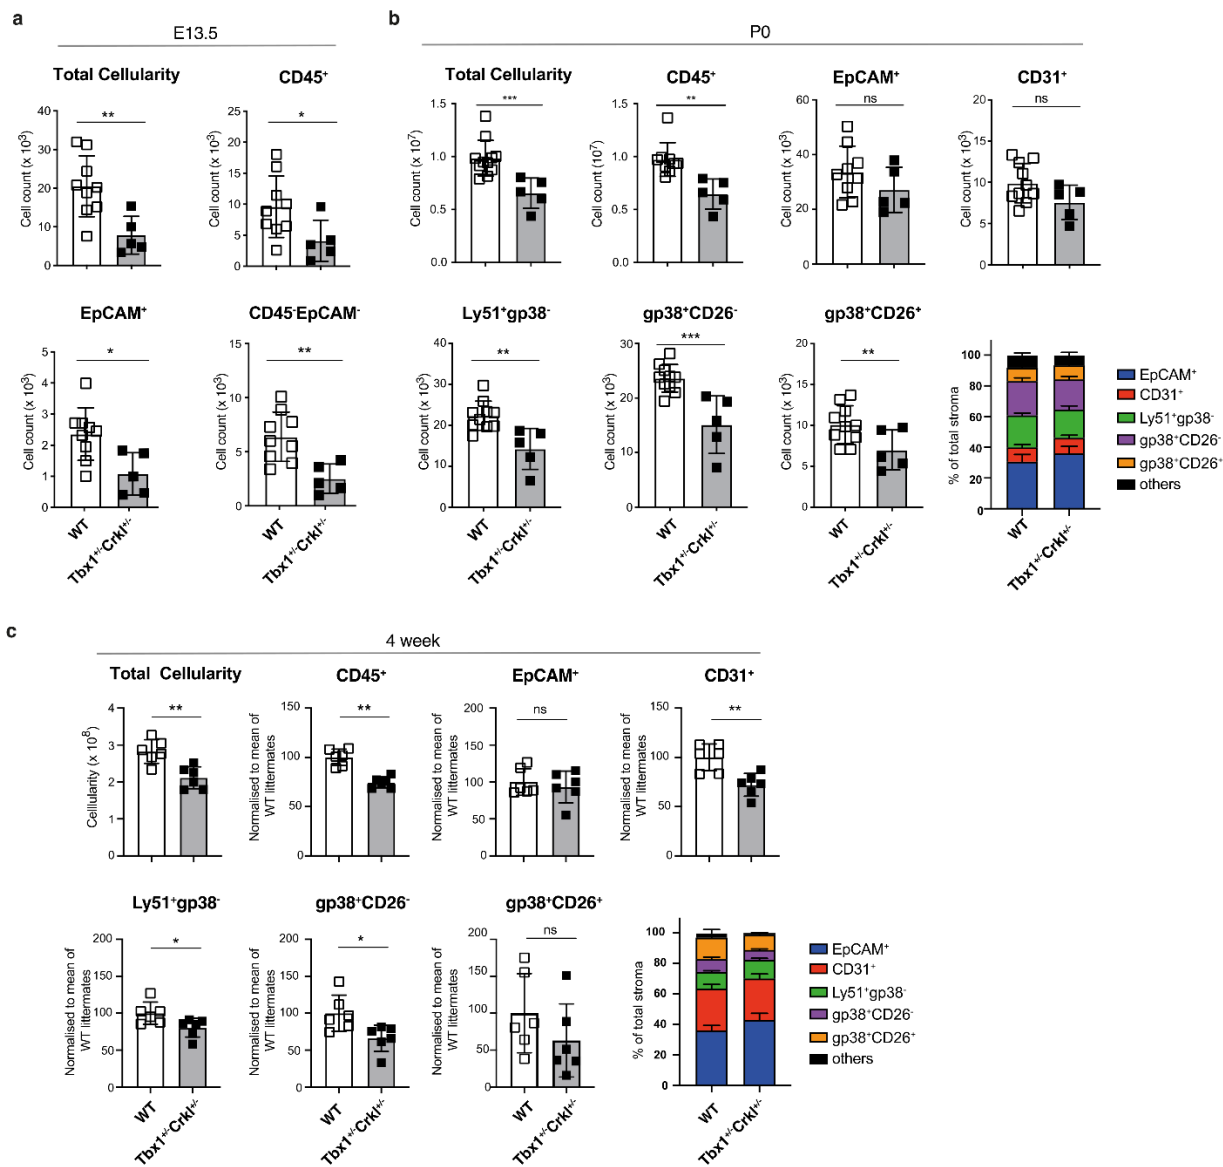

1004  
1005  
1006  
1007  
1008  
1009  
1010  
1011  
1012  
1013

**Fig. 3 Ligand-receptor interaction of neural crest derived cells and other thymic cell types.**  
**(a) (Upper)** Heatmap of top ligand-receptor interactions of cell types signalling to NCC showing the Pearson's *r* for ligand activity in promoting ageing transition between E12.5/13.5 and E16.5.  
**(Lower)** Violin plots of the cell type-specific expression of the top two ligands, *Tgfb1* and *Vwfr*.  
**(b)** A UMAP plot showing weighted connections for the top 25% ligand-receptor-target networks for connections from neural crest cells. The width of the line is proportional to the strength of ligand-receptor interactions.  
**(c)** UMAP and violin plots of *Jam2* and *Jam3* expression.

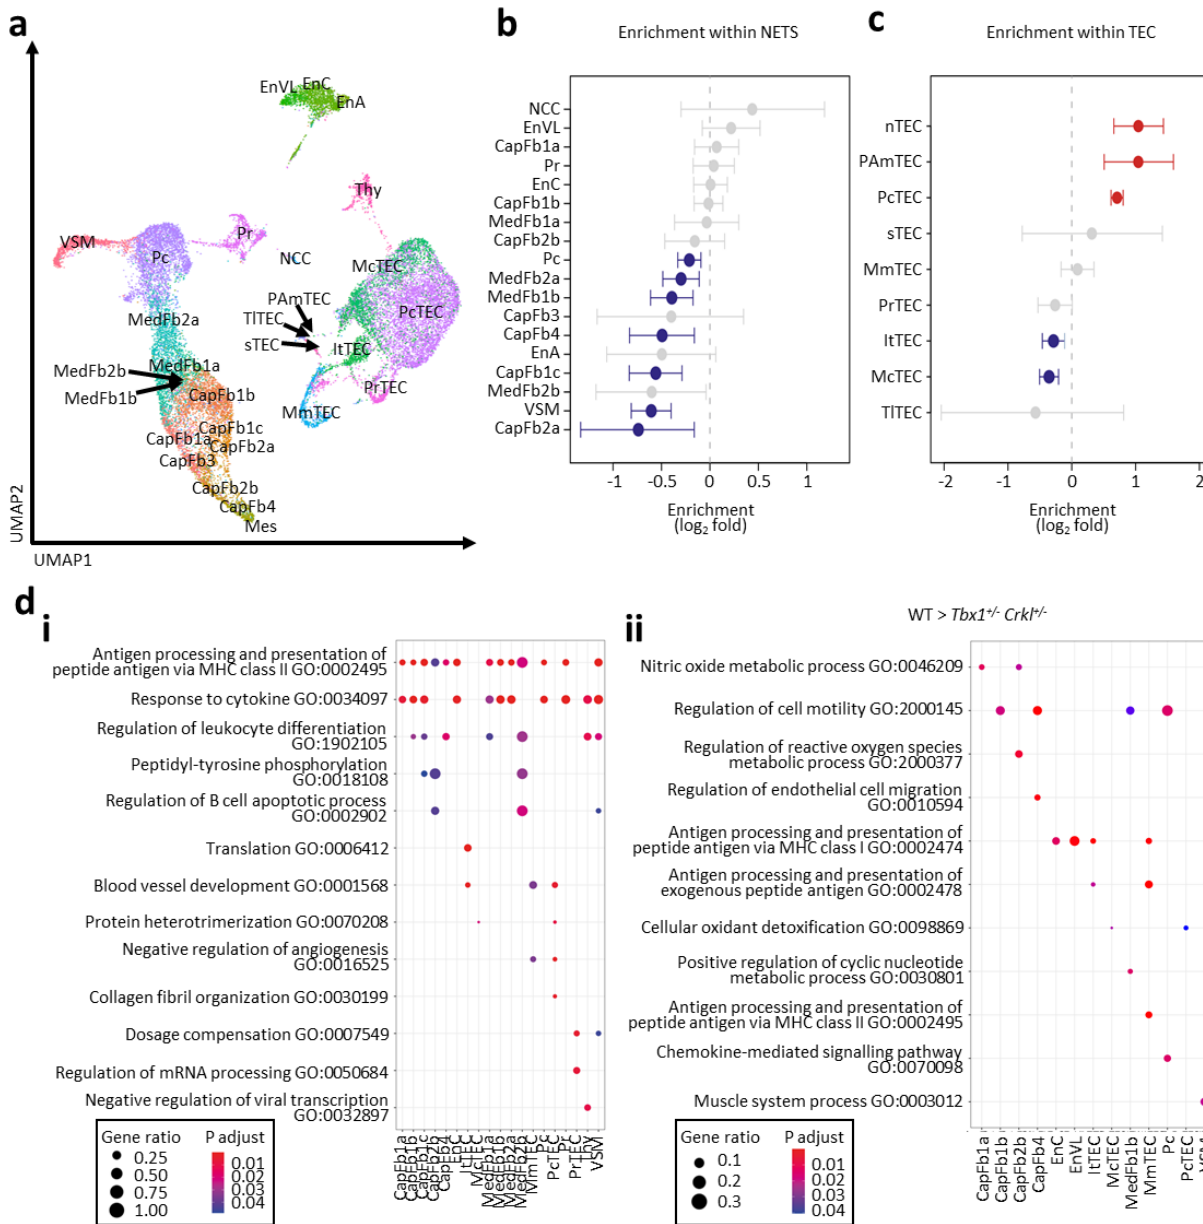

**Fig. 4. Reduction of non-epithelial thymic stroma in *Tbx1*<sup>+/-</sup>*Crkl*<sup>+/-</sup> thymi.** (a) Total cellularity, Number of CD45<sup>+</sup>, EpCAM<sup>+</sup> and total mesenchymal cells at E13.5 wildtype (n=9) and *Tbx1*<sup>+/-</sup>*Crkl*<sup>+/-</sup> (n=5) thymi. (b) Total thymic cellularity, absolute number of CD45<sup>+</sup>, EpCAM<sup>+</sup>, CD31<sup>+</sup>, Ly51<sup>+</sup>gp38<sup>-</sup>, CD26<sup>-</sup>gp38<sup>+</sup>, CD26<sup>+</sup>gp38<sup>+</sup> cells and the frequency of stromal subpopulations from wildtype (P0: n=9, 4-week: n=6) and *Tbx1*<sup>+/-</sup>*Crkl*<sup>+/-</sup> (P0: n=5, 4-week: n=6) neonates (b) and 4-week old mice (c). Data was normalised to the mean of wildtype litter mates from two independent experiments (n=3 from each experiment). Mean values were shown in the bar charts. Unpaired t-test, p<0.05(\*), 0.01(\*\*), 0.001(\*\*\*)

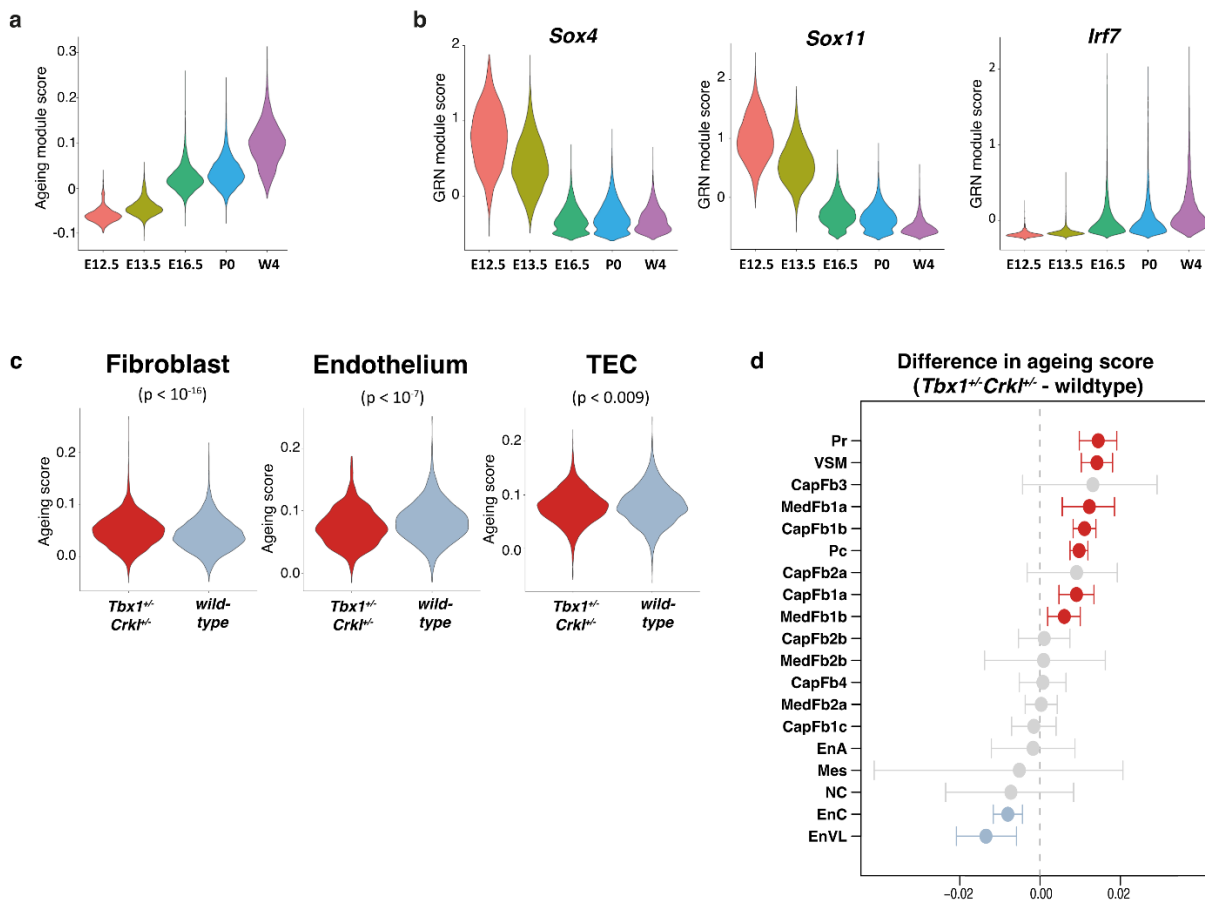

**Fig. 5 Thymic stromal cells from  $Tbx1^{+/-}Crkl^{+/-}$  and wild-type mice differ transcriptomically within cellular populations.**

A total of 10,300 cells from  $Tbx1^{+/-}Crkl^{+/-}$  and 11,151 cells from their wildtype littermates were analysed. (a) A UMAP plot showing thymic stromal cell types. Scatter plot of genotype-specific enrichment of cell type frequency in  $Tbx1^{+/-}Crkl^{+/-}$  and wild-type within NETS (b) and TEC (c). Error bars show 95% confidence intervals. (d) Gene ontology analysis of genes more highly expressed within each cell type in (i)  $Tbx1^{+/-}Crkl^{+/-}$  and (ii) wild-type thymi. (e) Scatter plot of the difference in ageing score of stromal cell subsets between  $Tbx1^{+/-}Crkl^{+/-}$  and wild-type. CapFb = capsular fibroblast; EnA = arterial endothelium; ENCC = capillary endothelium; EnVL = venous/lymphatic endothelium; itTEC = intertypical TEC; McTEC = mature cortical TEC; MedFb = medullary fibroblast; Mes = mesothelium; mmTEC = mature medullary TEC; NCC = neural crest; pAmTEC = post-AIRE medullary TEC; Pc = pericyte; pcTEC = perinatal cortical TEC; pr = proliferating cell; prTEC = proliferating TEC; sTEC = structural TEC; Thy = thymocyte; TITEC = tuft-like TEC; VSM = vascular smooth muscle. Symbol in red showed cell subtypes significantly enriched in  $Tbx1^{+/-}Crkl^{+/-}$  and symbol in blue showed population showed cell subtypes enriched in wildtype (b,c). Enrichments were calculated using Fisher's exact test with 95% confidence intervals and significance was adjusted for multiple hypothesis testing using Benjamini-Hochberg correction (b,c)

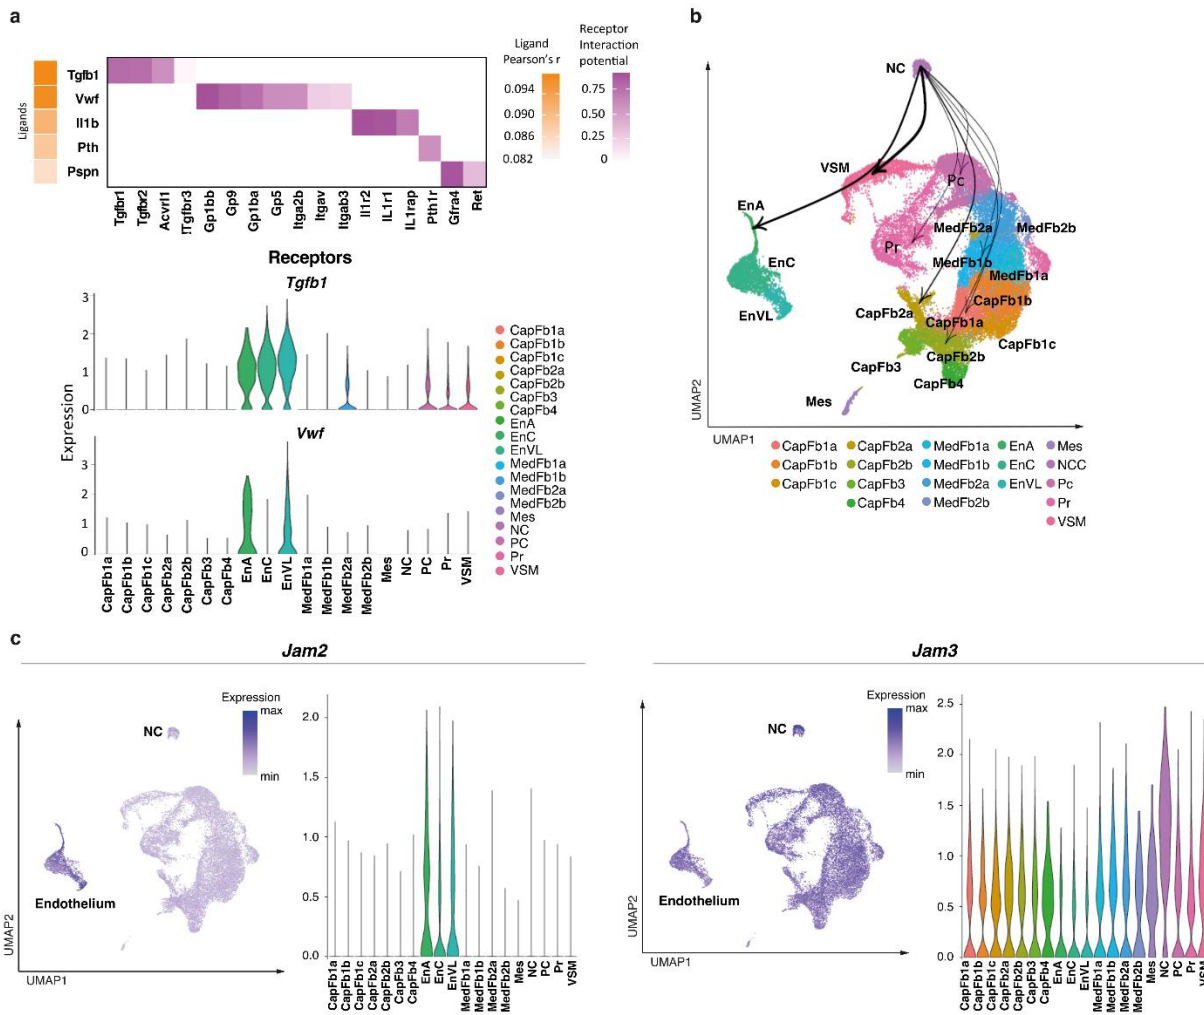

**Fig. 6 Age-specific transcriptomic programmes differ over development in thymic stroma.** (a) A violin plot showing the overall expression of genes associated with ageing in a tissue-independent manner within the NES across different ages (44). (b) Violin plots showing the expression of Sox4, Sox11 and Irf7 gene-regulatory networks. (c) Violin plot showing the ageing score of fibroblasts, endothelial cells and TECs from *Tbx1<sup>+/-</sup>Crkl<sup>+/-</sup>* and wild-type thymi at P0. Symbols in red showed cell subtypes significantly increased ageing score in *Tbx1<sup>+/-</sup>Crkl<sup>+/-</sup>* as compared to wildtype and symbols in blue showed population showed significantly reduced ageing score (d). Differences in gene module scores were estimated using Wilcoxon tests and were adjusted for multiple hypothesis testing using Benjamini-Hochberg correction (c,d).



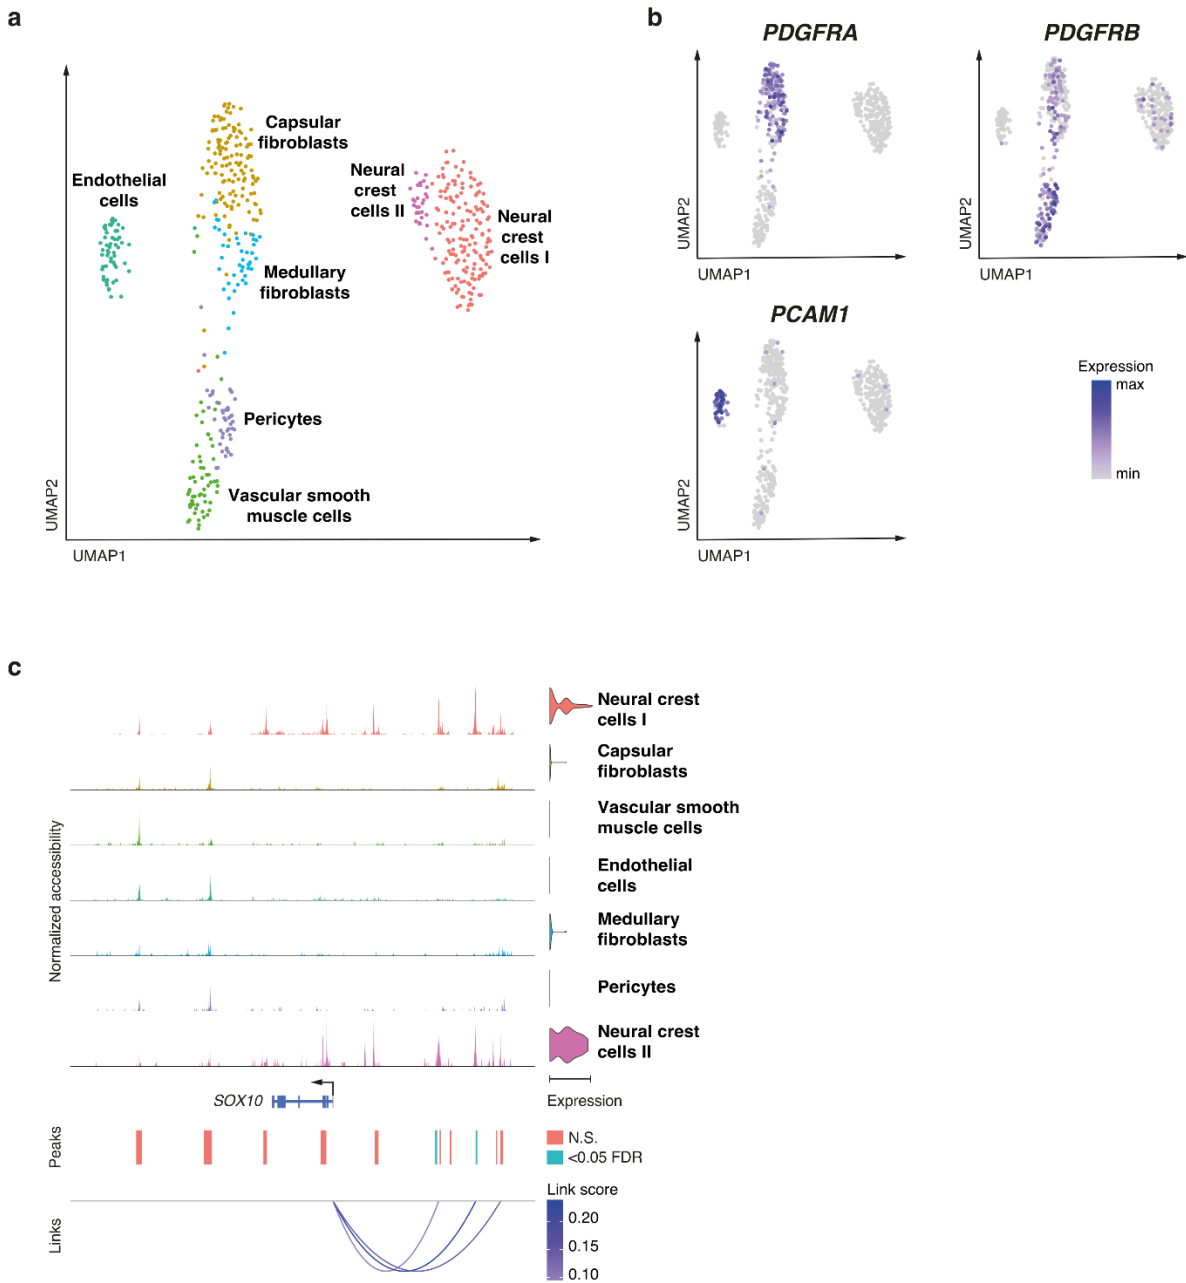

1058  
 1059 **Fig. 7 Single nuclei multiomics analysis of human thymic NES demonstrates diverse cell**  
 1060 **populations.** (a) UMAP plot of 528 nuclei showing joint projection of transcriptomic and  
 1061 chromatin accessibility data. (b) UMAP plot showing marker gene expression for *PDGFRA*,  
 1062 *PDGFRB* and *PCAM1*. (c) Links plot of the *SOX10* locus showing chromatin accessibility data,  
 1063 *SOX10* gene expression (violin plot on right), accessible chromatin peaks (blue peaks were  
 1064 significant for at least one cell type at FDR<0.05) and the correlations between chromatin  
 1065 accessibility and *SOX10* gene expression (shaded by the strength of each link). Significance of  
 1066 motif activity and chromatin accessibility were calculated using likelihood ratios, correcting for  
 1067 the size of chromatin accessibility libraries. P-values were adjusted for multiple hypothesis testing  
 1068 using Benjamini-Hochberg correction.  
 1069

| Cell type                 | 4-week cluster | All ages cluster        | Top genes                          | Peak age |
|---------------------------|----------------|-------------------------|------------------------------------|----------|
| Capsular fibroblasts      | CapFb1         | CapFb1a                 | <i>Itm2a, Clec3b, Capn6</i>        | E12.5    |
|                           |                | CapFb1b                 | <i>Cdo1, Ptn, Itm2a</i>            | P0       |
|                           |                | CapFb1c                 | <i>Lpl, Thbs1, Mt2</i>             | P0       |
|                           | CapFb2         | CapFb2a                 | <i>Adamts2, Mfap4, Bgn</i>         | E12.5    |
|                           |                | CapFb2b                 | <i>Coll1a1, Coll14a1, Mfap5</i>    | E12.5    |
|                           | CapFb3         | CapFb3                  | <i>Igf1, Dcn, Cpxm1</i>            | W4       |
| CapFb4                    | CapFb4         | <i>Fbn1, Mfap5, Dpt</i> | W4                                 |          |
| Medullary fibroblasts     | MedFb1         | MedFb1a                 | <i>Sele, Coll15a1, Tenm4</i>       | E13.5    |
|                           |                | MedFb1b                 | <i>Coll15a1, Col26a1, Serpine2</i> | W4       |
|                           | MedFb2         | MedFb2a                 | <i>Tmem176a, Des, Tmem176b</i>     | W4       |
|                           |                | MedFb2b                 | <i>Oasl2, Isg15, Iigp1</i>         | W4       |
| Proliferating fibroblasts | Pr             | Pr                      | <i>Stmn1, H2afz, Hmgb2</i>         | E13.5    |
| Pericytes                 | Pc             | Pc                      | <i>Colec11, Gucy1a1, Ebf1</i>      | E16.5    |
| Vascular smooth muscle    | VSM            | VSM                     | <i>Myh11, Tpm1, Nrip2</i>          | W4       |
| Neural crest cells        | NCC            | NCC                     | <i>Mal, Plp1, Dbi</i>              | E12.5    |
| Endothelium               | En             | EnA                     | <i>Fbln5, Icam2, Egf18</i>         | W4       |
|                           |                | EnC                     | <i>Gpihbp1, Rgcc, Fabp4</i>        | W4       |
|                           |                | EnVL                    | <i>Selp, Pecam1, Aqp1</i>          | W4       |
| Mesothelium               | Mes            | Mes                     | <i>Upk3b, 2010300C02Rik, Krt19</i> | W4       |

1070 **Table 1. Thymic stromal cell types identified by single cell RNA-seq.** The three top genes (by  
1071 area under the curve) and peak age are shown for each cluster. All clusters show significant  
1072 differences in proportional makeup of the non-TEC thymic stromal across different ages (Fisher's  
1073 test with 10,000 permutations: all  $p < 0.0001$ ).
